# Supplementary material for: Unravelling the antifungal and antiprotozoal activities and LC-MS/MS quantification of steroidal saponins isolated fromPanicum turgidum
Source: Royal Society of Chemistry journal article supplement (doi:10.1039/d1ra08532h), 2022-01-01
Supplement: d1ra08532h1.pdf [file d1ra08532h1.pdf]

## Unravelling the antifungal and antiprotozoal activities and LC-MS/MS quantification of steroidal saponins isolated from *Panicum turgidum*

Ahmed A. Zaki<sup>a,b\*</sup>, Mohamed M. Y. Kaddah<sup>c</sup>, Hamada S. Abulkhair<sup>d,e\*</sup>, Ahmed Ashour<sup>a,b</sup>

### Supplementary file

#### Contents

|       |                                                |    |
|-------|------------------------------------------------|----|
| 1     | List of Supplementary Figures and Tables ..... | 2  |
| 2     | Docking files .....                            | 13 |
| 2.1   | Antifungal, 5V5Z.....                          | 13 |
| 2.1.1 | 1YN redocked.....                              | 13 |
| 2.1.2 | Compound #4 .....                              | 22 |
| 2.1.3 | Compound #5 .....                              | 24 |
| 2.1.4 | Compound #6 .....                              | 26 |
| 2.1.5 | Compound #7 .....                              | 28 |
| 2.2   | Antitrypanosomal, 2JK6 .....                   | 30 |
| 2.2.1 | FAD Redocked .....                             | 30 |
| 2.2.2 | Compound #4 .....                              | 33 |
| 2.2.3 | Compound #5 .....                              | 42 |
| 2.2.4 | Compound # 6.....                              | 44 |
| 2.2.5 | Compound #6 .....                              | 44 |
| 2.2.6 | Compound #7 .....                              | 46 |
| 3     | PASS online predictions.....                   | 48 |

## 1 List of Supplementary Figures and Tables

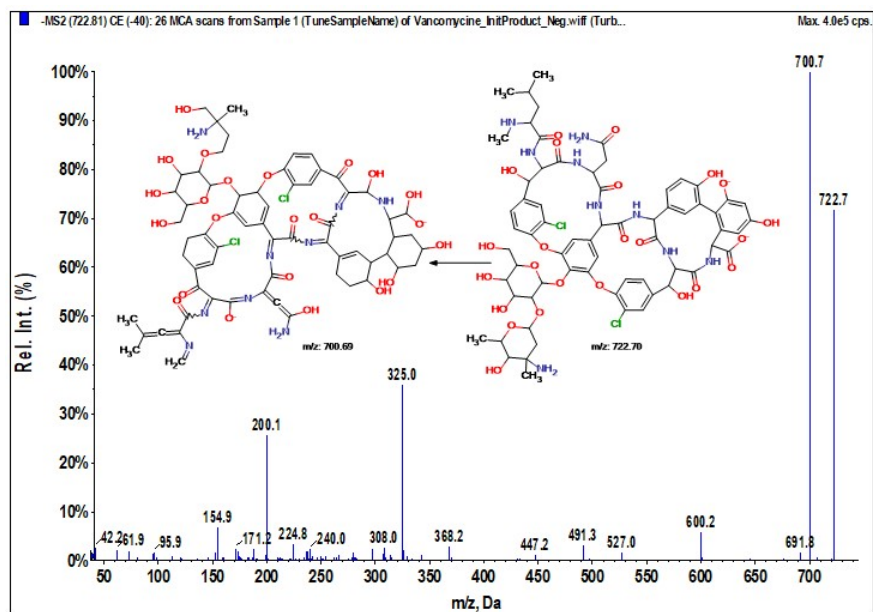

**Figure S1:** ESI-MS/MS spectrum showing the precursor and the product ions of vancomycin under the negative mode.

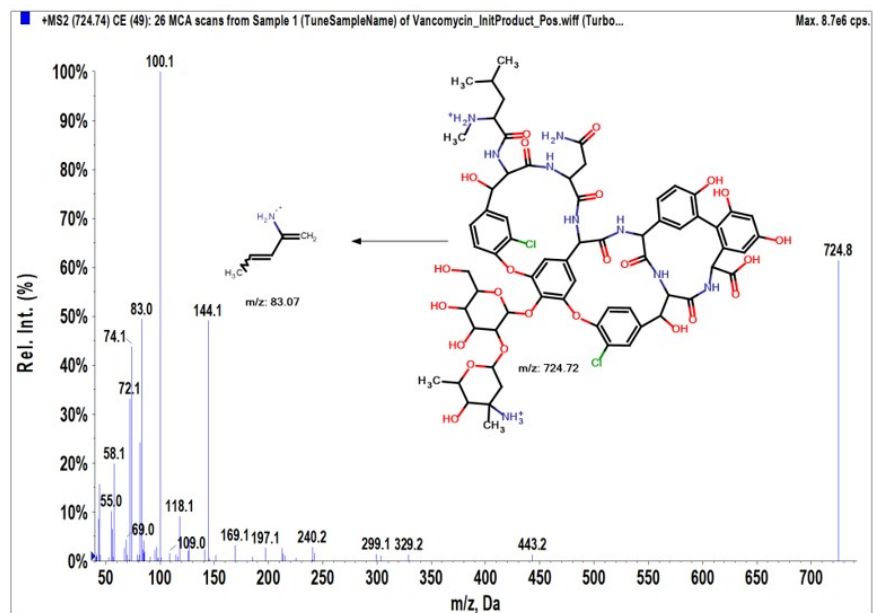

**Figure S2:** ESI-MS/MS spectrum showing the precursor and the product ions of vancomycin under the positive mode.

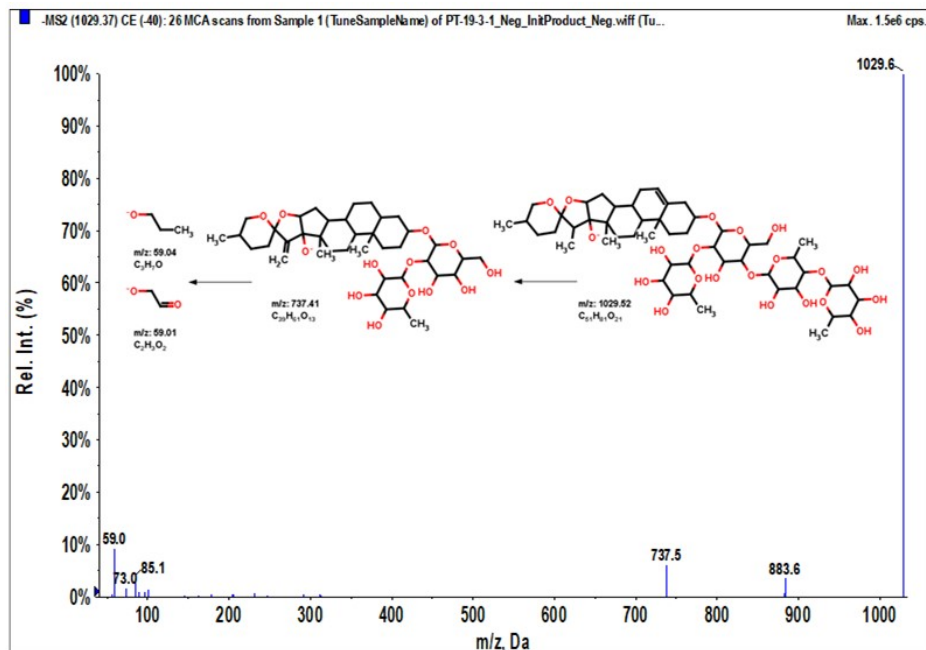

**Figure S3:** ESI-MS/MS spectrum showing the precursor and the product ions of compound 4 under the negative mode.

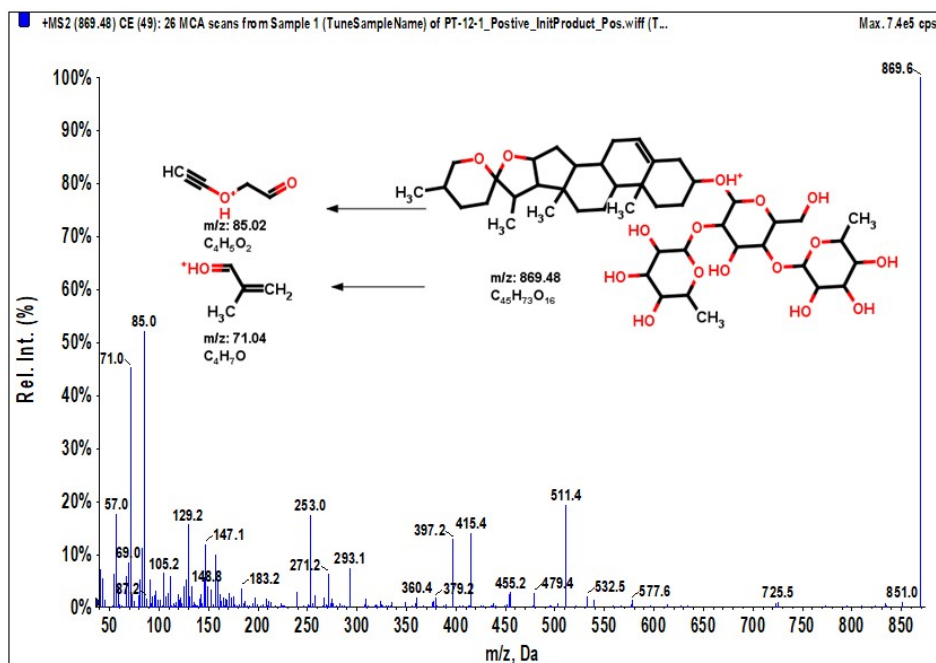

**Figure S4:** ESI-MS/MS spectrum showing the precursor and the product ions of compound 5 under the positive mode.

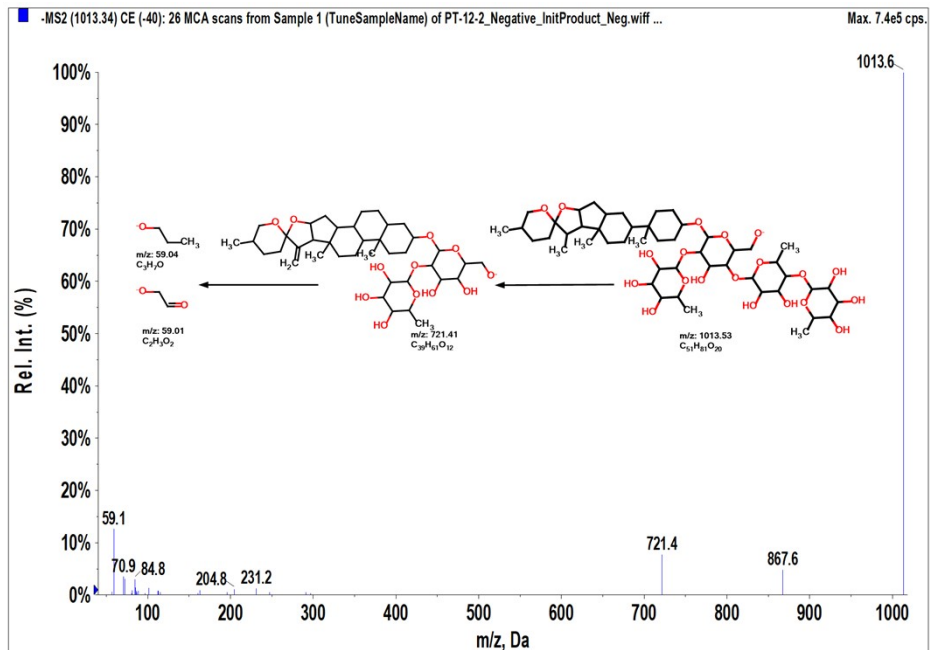

**Figure S5:** ESI-MS/MS spectrum showing the precursor and the product ions of compound **6** under the negative mode.

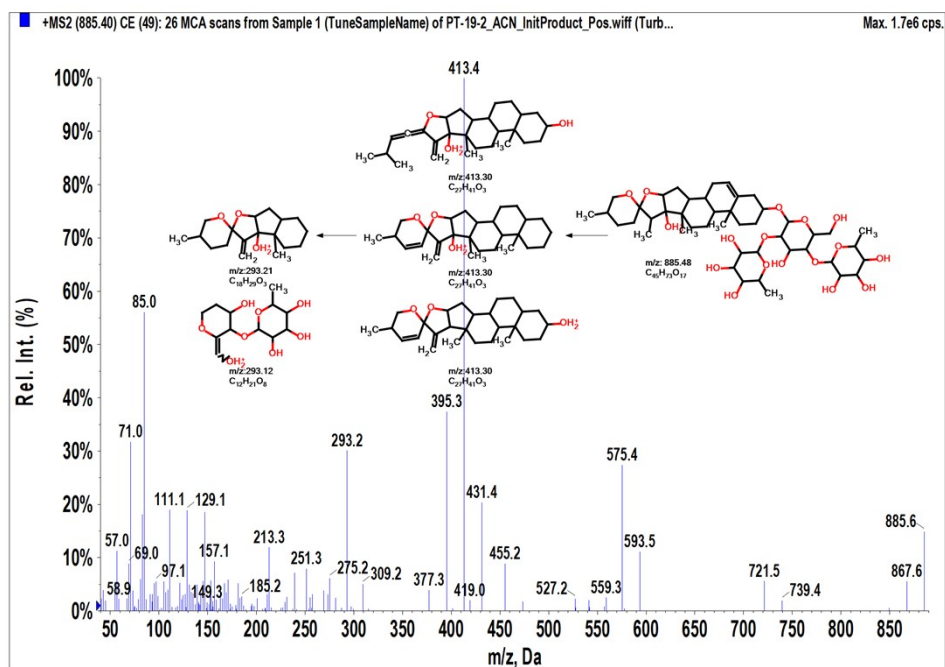

**Figure S6:** ESI-MS/MS spectrum showing the precursor and the product ions of compound **7** under the positive mode.

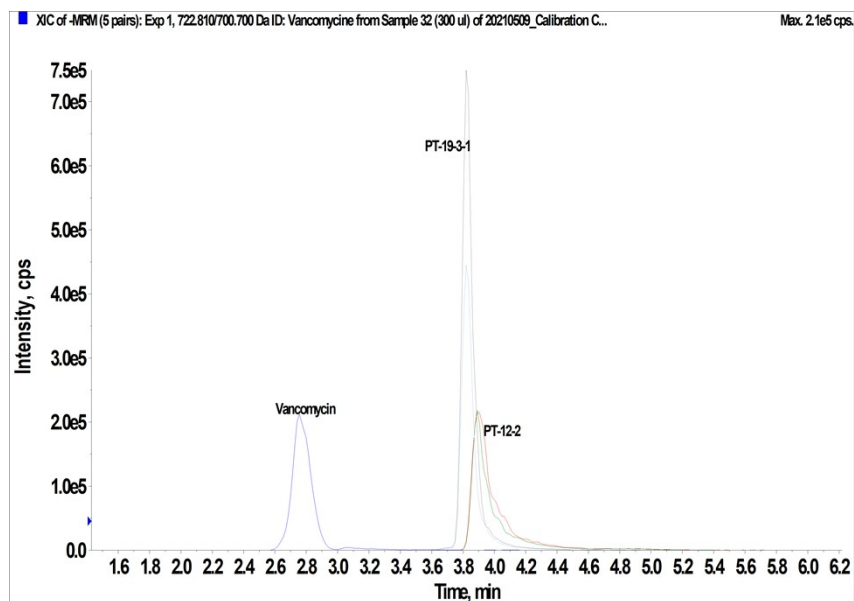

**Figure S7:** Representative extracted negative ion MRM chromatograms of **4** ( $m/z$ : 1029.6/737.5 & 1029.6/59 Da), **6** ( $m/z$ : 1013.6/721.4 & 1013.6/59.1 Da), and vancomycin (IS) ( $m/z$ : 722.7/700.7 Da)

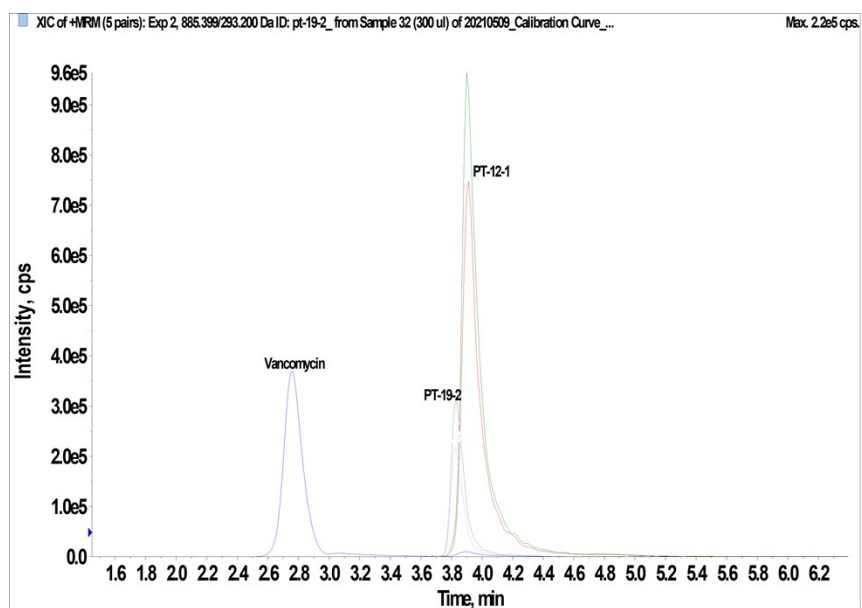

**Figure S8:** Representative extracted positive ion MRM chromatograms of **7**, **5**, and vancomycin (IS)

**Table S1:** Time programming of the gradient elution using A: 0.01% formic acid in water and B: 0.01% formic acid in methanol

| No | Time (min) | Flow (mL/min) | % Aqueous phase (A) | % Organic phase (B) |
|----|------------|---------------|---------------------|---------------------|
| 1  | 0          | 0.5           | 70                  | 30                  |
| 2  | 1          | 0.5           | 70                  | 30                  |
| 3  | 5          | 0.5           | 0                   | 100                 |
| 4  | 6          | 0.5           | 0                   | 100                 |
| 5  | 6.5        | 0.5           | 70                  | 30                  |
| 6  | 8          | 0.5           | 70                  | 30                  |

**Table S2:** Intra-day accuracy and precision of selected compounds

| Analyte | Concentration level | Intra-day accuracy and precision ( $n=3$ ) |                                     |      |
|---------|---------------------|--------------------------------------------|-------------------------------------|------|
|         |                     | Nominal concentration (ng/mL)              | Found concentration (mean $\pm$ SD) | % CV |
| 6       | LQC                 | 20                                         | 19.38 $\pm$ 0.26                    | 1.32 |
|         | MQC                 | 600                                        | 603.82 $\pm$ 12.80                  | 2.12 |
|         | HQC                 | 800                                        | 831.63 $\pm$ 41.12                  | 4.94 |
| 4       | LQC                 | 20                                         | 19.45 $\pm$ 0.64                    | 3.30 |
|         | MQC                 | 600                                        | 592.92 $\pm$ 23.39                  | 3.94 |
|         | HQC                 | 800                                        | 837.6 $\pm$ 23.69                   | 2.83 |
| 5       | LQC                 | 20                                         | 18.96 $\pm$ 0.64                    | 3.38 |
|         | MQC                 | 600                                        | 605.03 $\pm$ 18.78                  | 3.10 |
|         | HQC                 | 800                                        | 810.40 $\pm$ 53.89                  | 6.65 |
| 7       | LQC                 | 20                                         | 21.43 $\pm$ 0.76                    | 3.53 |
|         | MQC                 | 600                                        | 606.8 $\pm$ 17.42                   | 2.87 |
|         | HQC                 | 800                                        | 791.23 $\pm$ 55.21                  | 6.98 |

**Table S3:** Online PASS-prediction of new saponins as antifungal and antiprotozoal

| Comp. #   | Antifungal |      | Antiprotozoal<br>(Leishmania) |      |
|-----------|------------|------|-------------------------------|------|
|           | * Pa %     | Pi % | Pa %                          | Pi % |
| <b>1.</b> | 74.10      | 0.80 | 82.50                         | 0.40 |
| <b>2.</b> | 72.20      | 0.90 | 80.10                         | 0.50 |
| <b>3.</b> | 71.30      | 0.90 | 73.90                         | 0.70 |
| <b>4.</b> | 79.90      | 0.50 | 93.00                         | 0.20 |
| <b>5.</b> | 85.30      | 0.30 | 95.70                         | 0.20 |
| <b>6.</b> | 85.30      | 0.30 | 95.70                         | 0.20 |
| <b>7.</b> | 79.90      | 0.50 | 93.00                         | 0.20 |

\* Pa = probability that the compound is active; Pi = probability that the compound is inactive.

**Table S4:** Docking results of 1YN and the best effective antifungal Turgidosterones (**4, 5, 6, and 7**).

| Comp. No   | $\Delta G$<br>(kcal/mol) | RMSD<br>(Å) | Residue |     | Type        | Length<br>(Å) |
|------------|--------------------------|-------------|---------|-----|-------------|---------------|
|            |                          |             | Name    | ID  |             |               |
| <b>1YN</b> | -12.38                   | 1.18        | Cys     | 470 | H. bond     | 4.23          |
|            |                          |             | Tyr     | 118 | Hydrophobic | 3.23          |
|            |                          |             | Ala     | 61  | Hydrophobic | 3.89          |
|            |                          |             | Tyr     | 64  | Hydrophobic | 4.13          |
|            |                          |             | Leu     | 376 | Hydrophobic | 4.25          |
| <b>1</b>   | -1.80                    | 1.82        | Cys     | 470 | H. Bond     | 3.18          |
|            |                          |             | Met     | 508 | H. Bond     | 2.41          |
|            |                          |             | His     | 377 | H. Bond     | 2.96          |
| <b>2</b>   | -4.07                    | 1.78        | Ser     | 378 | H. Bond     | 2.78          |

| Comp. No | $\Delta G$<br>(kcal/mol) | RMSD<br>(Å) | Residue |     | Type        | Length<br>(Å) |
|----------|--------------------------|-------------|---------|-----|-------------|---------------|
|          |                          |             | Name    | ID  |             |               |
|          |                          |             | Tyr     | 118 | H. Bond     | 2.85          |
|          |                          |             | Arg     | 381 | H. Bond     | 2.93          |
|          |                          |             | His     | 468 | H. Bond     | 3.35          |
|          |                          |             | His     | 468 | Hydrophobic | 4.49          |
| <b>3</b> | -9.73                    | 1.91        | Cys     | 470 | H. Bond     | 3.48          |
|          |                          |             | Ser     | 507 | H. Bond     | 3.23          |
|          |                          |             | Ser     | 378 | H. Bond     | 3.04          |
|          |                          |             | Lys     | 143 | H. Bond     | 3.54          |
| <b>4</b> | -11.32                   | 1.73        | Gly     | 303 | H. bond     | 2.76          |
|          |                          |             | Cys     | 470 | H. bond     | 3.39          |
|          |                          |             | Gly     | 308 | H. bond     | 3.13          |
|          |                          |             | His     | 377 | Hydrophobic | 4.04          |
| <b>5</b> | -9.89                    | 1.59        | Gly     | 303 | H. bond     | 2.84          |
|          |                          |             | His     | 468 | H. bond     | 2.84          |
|          |                          |             | Cys     | 470 | H. bond     | 3.15          |
|          |                          |             | Gly     | 472 | H. bond     | 3.29          |
|          |                          |             | Tyr     | 118 | Hydrophobic | 4.61          |
| <b>6</b> | -13.43                   | 1.56        | His     | 468 | H. bond     | 2.89          |
|          |                          |             | Cys     | 470 | H. bond     | 3.28          |
|          |                          |             | Tyr     | 118 | H. bond     | 2.92          |
|          |                          |             | Gly     | 472 | H. bond     | 3.29          |
| <b>7</b> | -9.90                    | 1.93        | His     | 468 | H. bond     | 2.81          |
|          |                          |             | Cys     | 470 | H. bond     | 3.98          |
|          |                          |             | His     | 468 | H. bond     | 3.30          |
|          |                          |             | His     | 377 | Hydrophobic | 4.11          |



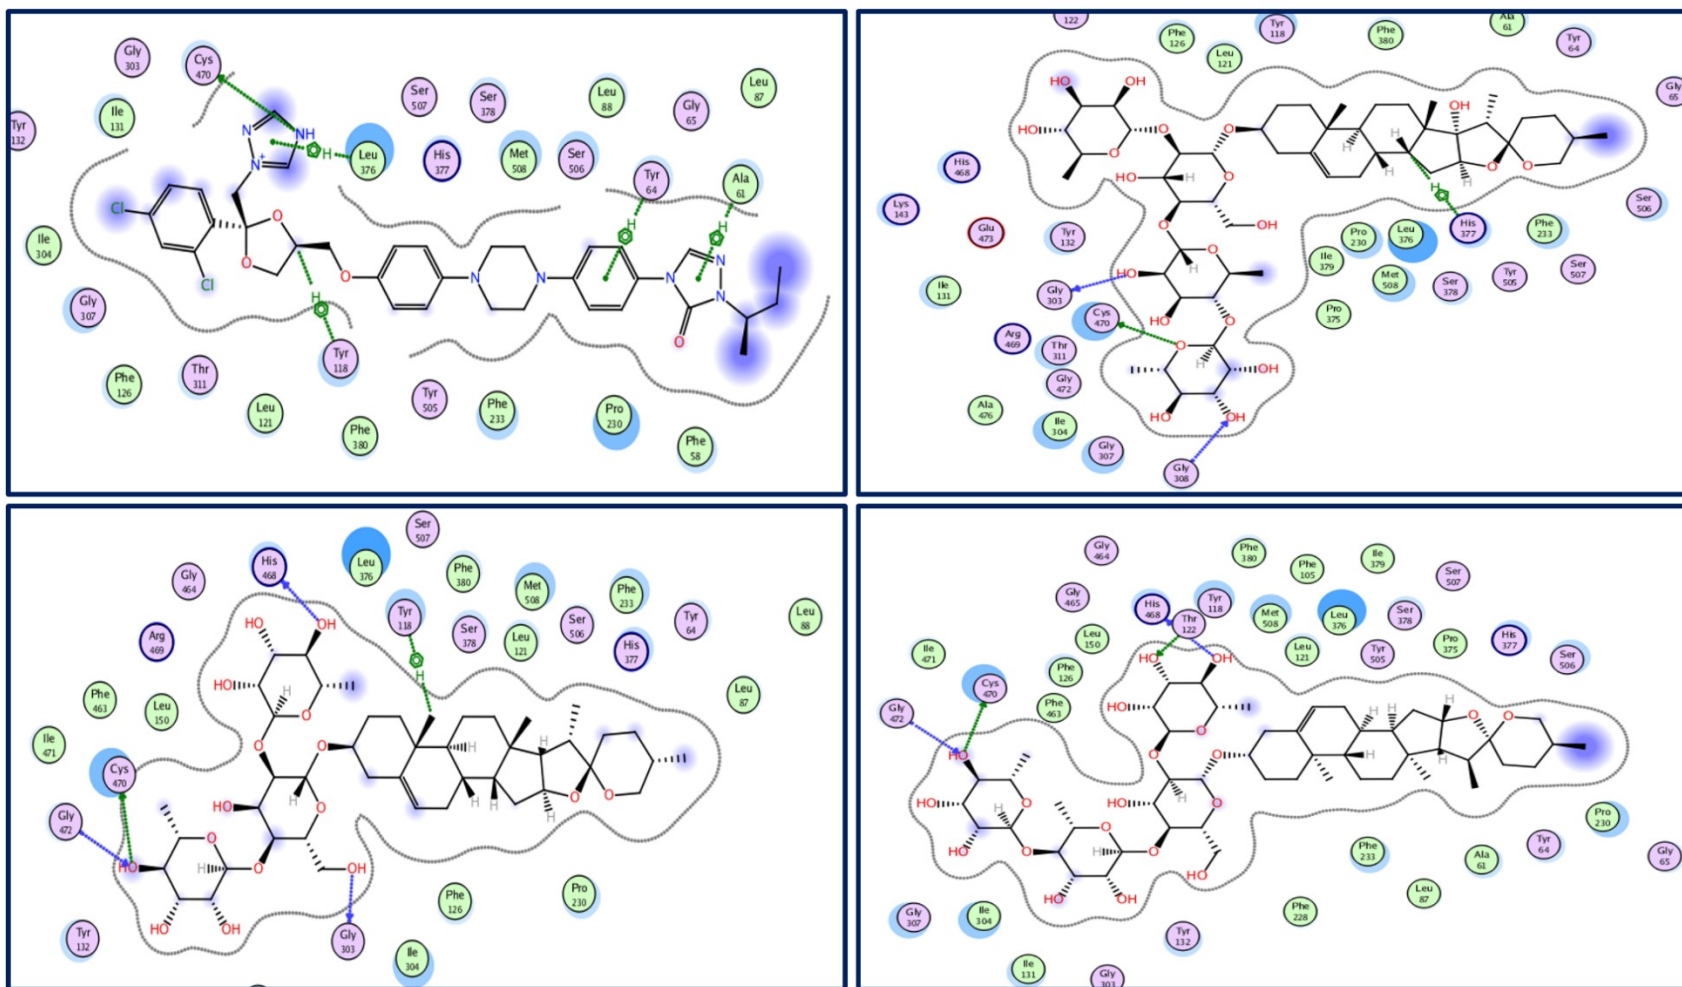

**Figure S9:** 2D interactions of 1YN (upper left), 4 (upper right), 5 (lower left), and 6 (lower right) with the active site of *C. albicans* oxidoreductase target site.

**Table S5:** Docking results of FAD and the best effective antitrypanosomal Turgidosterones (4, 5, 6, and 7).

| Comp. No | $\Delta G$ (kcal/mol) | RMSD (Å) | Residue |     | Type        | Length (Å) |
|----------|-----------------------|----------|---------|-----|-------------|------------|
|          |                       |          | Name    | ID  |             |            |
| FAD      | -10.29                | 1.61     | Asp     | 35  | H. bond     | 2.43       |
|          |                       |          | Asp     | 327 | H. bond     | 2.47       |
|          |                       |          | Thr     | 51  | H. bond     | 2.35       |
|          |                       |          | Ser     | 14  | H. bond     | 3.46       |
|          |                       |          | Gly     | 127 | H. bond     | 2.78       |
|          |                       |          | Thr     | 335 | H. bond     | 2.69       |
|          |                       |          | Lys     | 60  | H. bond     | 2.64       |
|          |                       |          | Gly     | 15  | H. bond     | 2.58       |
|          |                       |          | Cys     | 57  | Hydrophobic | 3.68       |
|          |                       |          | Tyr     | 198 | Hydrophobic | 3.98       |
| <b>1</b> | 22.17                 | 1.60     | Asp     | 327 | H. Bond     | 3.16       |
| <b>2</b> | 13.73                 | 1.60     | Asp     | 327 | H. Bond     | 2.52       |
|          |                       |          | Ala     | 365 | H. Bond     | 2.44       |
|          |                       |          | Cys     | 364 | H. Bond     | 3.70       |
|          |                       |          | Gly     | 13  | H. Bond     | 3.02       |
|          |                       |          | Cys     | 364 | H. Bond     | 3.26       |
| <b>3</b> | 1.48                  | 1.73     | Val     | 55  | H. Bond     | 2.50       |
|          |                       |          | Cys     | 57  | H. Bond     | 3.25       |
|          |                       |          | Ser     | 178 | H. Bond     | 2.83       |
|          |                       |          | Gln     | 439 | H. Bond     | 2.46       |
| <b>4</b> | -4.41                 | 1.67     | Val     | 55  | H. bond     | 2.68       |

| Comp. No | $\Delta G$ (kcal/mol) | RMSD (Å) | Residue |     | Type    | Length (Å) |
|----------|-----------------------|----------|---------|-----|---------|------------|
|          |                       |          | Name    | ID  |         |            |
|          |                       |          | Cys     | 57  | H. bond | 3.52       |
|          |                       |          | Asp     | 327 | H. bond | 2.67       |
|          |                       |          | Tyr     | 198 | H. bond | 2.94       |
|          |                       |          | Gly     | 56  | H. bond | 2.84       |
|          |                       |          | Gly     | 56  | H. bond | 2.92       |
|          |                       |          | Thr     | 335 | H. bond | 2.82       |
|          |                       |          | Arg     | 290 | H. bond | 3.21       |
| <b>5</b> | -0.789                | 1.46     | Cys     | 52  | H. bond | 3.34       |
|          |                       |          | Cys     | 57  | H. bond | 3.10       |
|          |                       |          | Pro     | 435 | H. bond | 2.75       |
|          |                       |          | Thr     | 51  | H. bond | 3.04       |
|          |                       |          | Lys     | 60  | H. bond | 2.63       |
| <b>6</b> | -3.72                 | 1.97     | Ala     | 159 | H. bond | 2.55       |
|          |                       |          | Thr     | 160 | H. bond | 2.48       |
|          |                       |          | Tyr     | 198 | H. bond | 2.94       |
|          |                       |          | Gly     | 15  | H. bond | 3.17       |
|          |                       |          | Thr     | 51  | H. bond | 3.06       |
|          |                       |          | Thr     | 51  | H. bond | 2.59       |
| <b>7</b> | 4.61                  | 1.61     | Cys     | 57  | H. bond | 2.90       |
|          |                       |          | Pro     | 435 | H. bond | 3.20       |
|          |                       |          | Thr     | 51  | H. bond | 2.54       |
|          |                       |          | Lys     | 60  | H. bond | 2.56       |
|          |                       |          | Gln     | 439 | H. bond | 3.13       |
|          |                       |          | Ser     | 14  | H. bond | 2.53       |

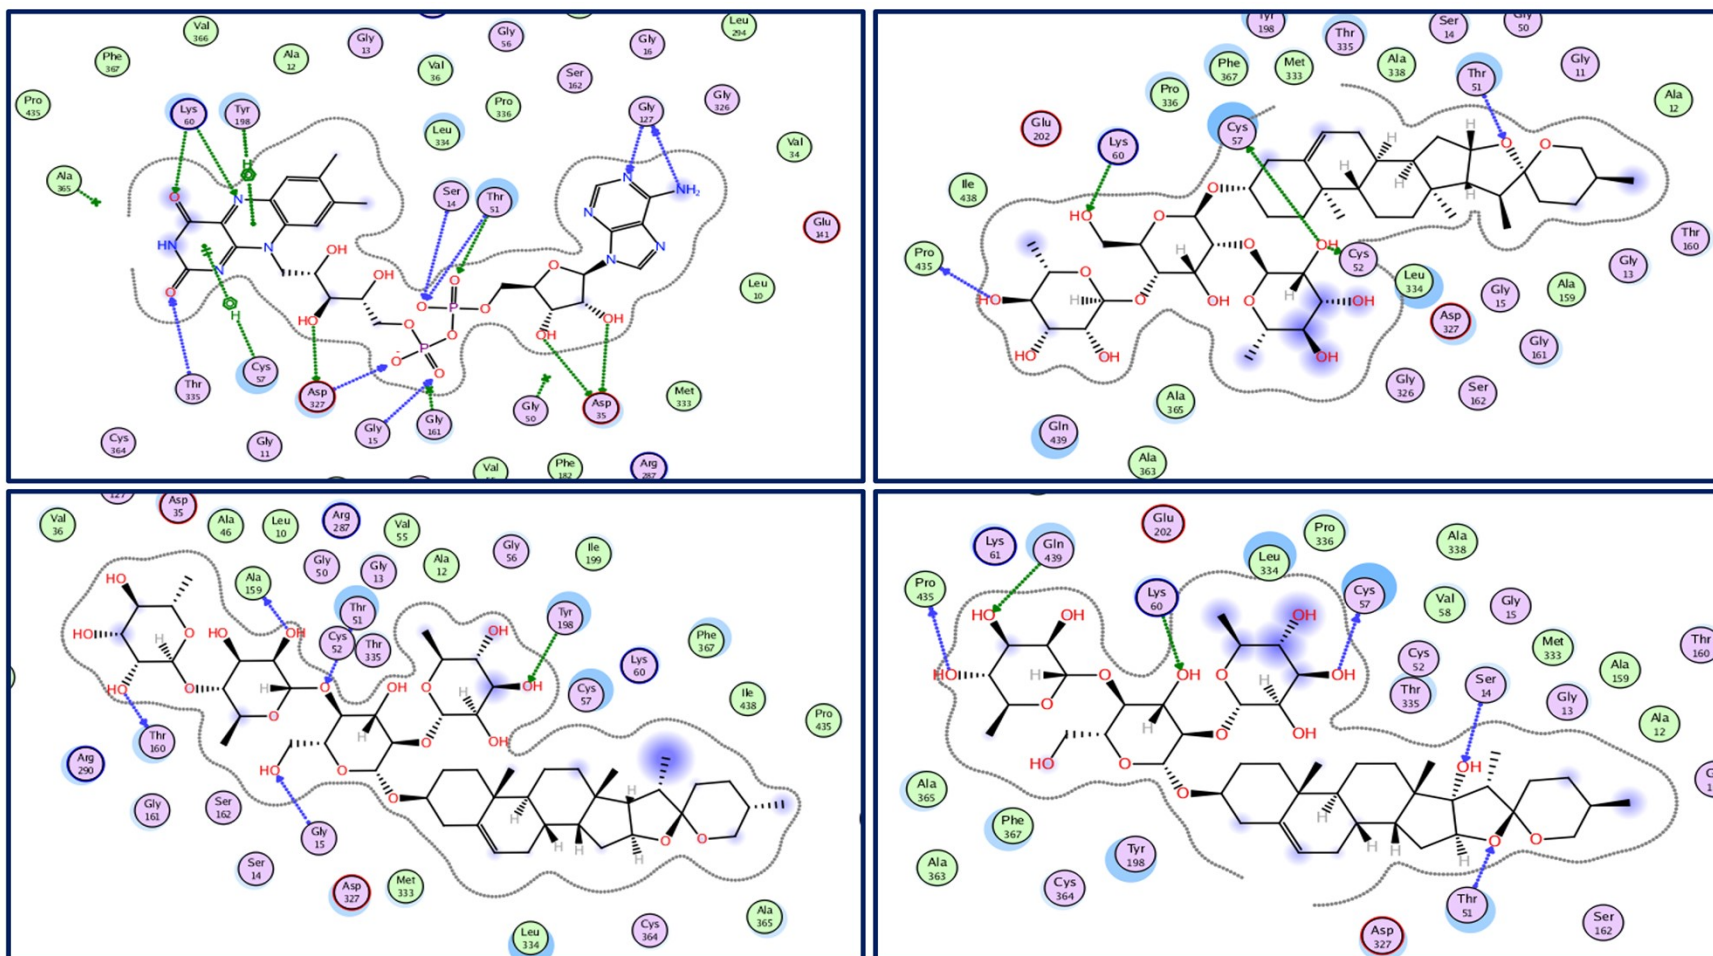

**Figure S10:** 2D interactions of FAD (upper left), 5 (upper right), 6 (lower left), and 7 (lower right) with the active site of trypanothione reductase

## 2 Docking files

### 2.1 Antifungal, 5V5Z

#### 2.1.1 1YN redocked

Score -12.3857269 RNSD 1.18514907

Ligand Interactions Report

Mon Sep 20 09:19:53 2021 (MOE 2014.09)

5v5z prepared.pdb: OXIDOREDUCTASE/OXIDOREDUCTASE INHIBITOR / 5v5z prepared.pdb: OXIDOREDUCTASE/OXIDOREDUCTASE INHIBITOR

Ligand Receptor Interaction Distance E (kcal/mol)

|        |     |        |     |      |             |      |      |
|--------|-----|--------|-----|------|-------------|------|------|
| N39    | 39  | SG     | CYS | 470  | H-donor     | 4.23 | -0.7 |
| C31    | 31  | 6-ring | TYR | 118  | Hydrophobic | 3.97 | -0.7 |
| 5-ring | CB  | ALA    | 61  | pi-H | 3.89        | -0.6 |      |
| 6-ring | CE2 | TYR    | 64  | pi-H | 4.13        | -0.6 |      |
| 5-ring | CD1 | LEU    | 376 | pi-H | 4.25        | -1.0 |      |

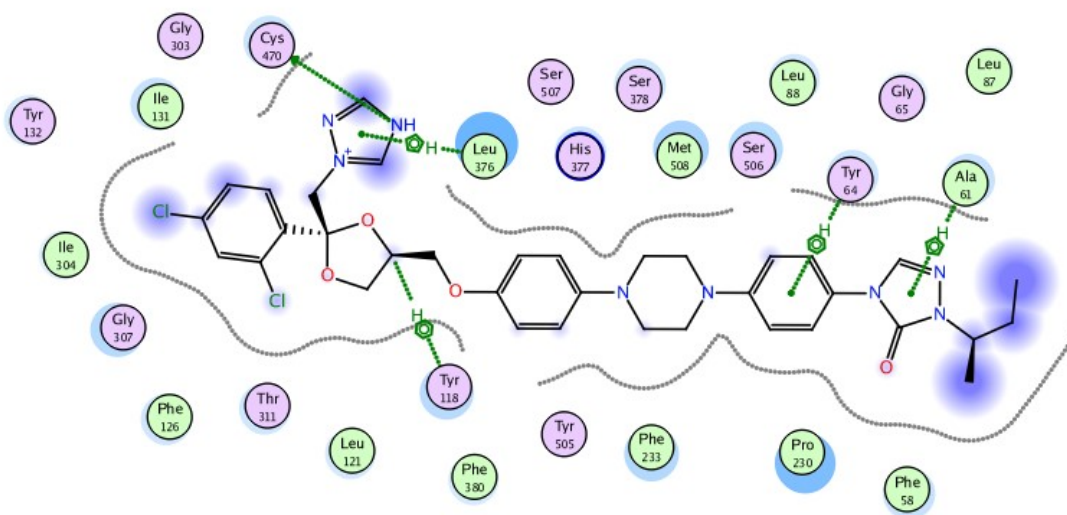

2D interactions of 1YN with *Candida albicans* oxidoreductases

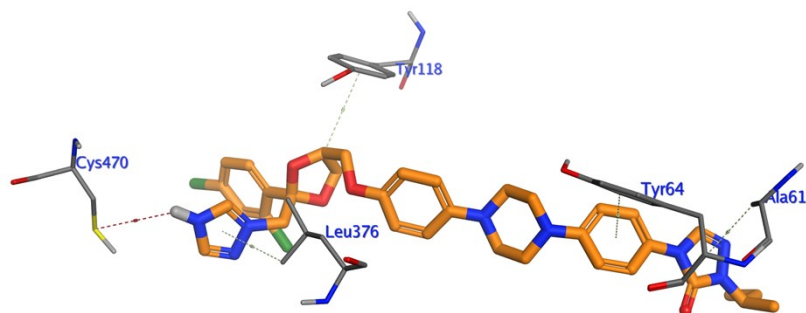

3D interactions of 1YN with *Candida albicans* oxidoreductases

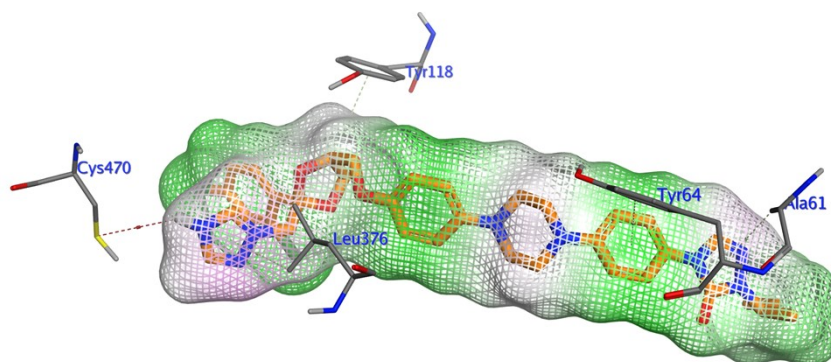

Positioning of 1YN with *Candida albicans* oxidoreductases



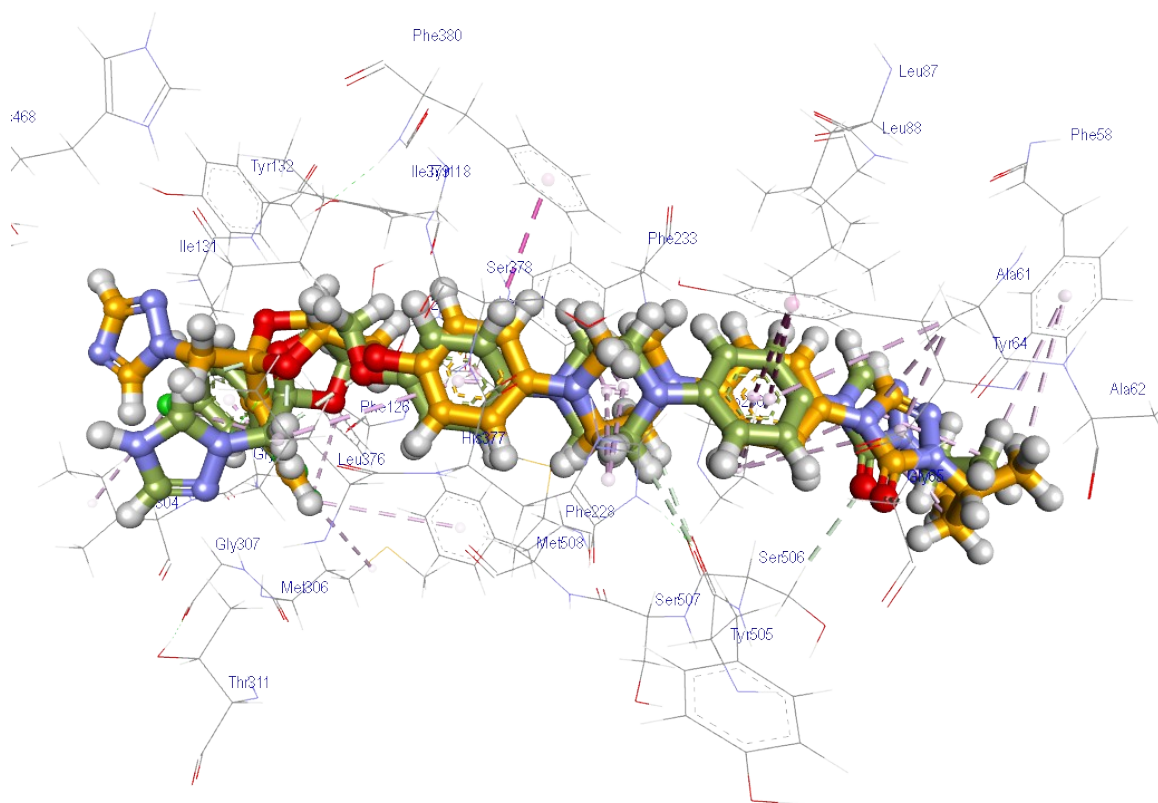

Superimposition of the re-docked 1YN conformer (golden) over that of the co-crystallized one (green) with RMSD value of 1.16

### 2.1.2 Compound #1

Score -1.80028617 RMSD 1.8228012

Ligand Interactions Report

Mon Dec 13 13:30:58 2021 (MOE 2014.09)

5v5z prepared.pdb: OXIDOREDUCTASE/OXIDOREDUCTASE INHIBITOR / 5v5z prepared.pdb

| Ligand | Receptor | Interaction | Distance   | E (kcal/ml) |
|--------|----------|-------------|------------|-------------|
| O      | 38 SG    | CYS 470     | H-donor    | 3.18 -1.3   |
| O      | 48 O     | MET 508     | H-donor    | 2.41 1.8    |
| O      | 46 N     | HIS 377     | H-acceptor | 2.96 -3.0   |

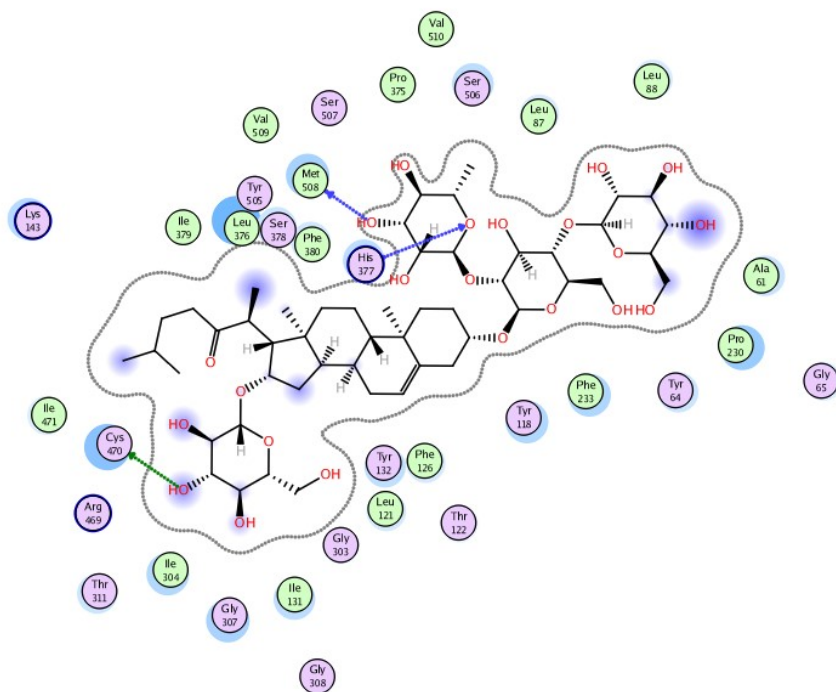

2D interactions of **1** with *Candida albicans* oxidoreductases



Entry: 6/10  
mol:

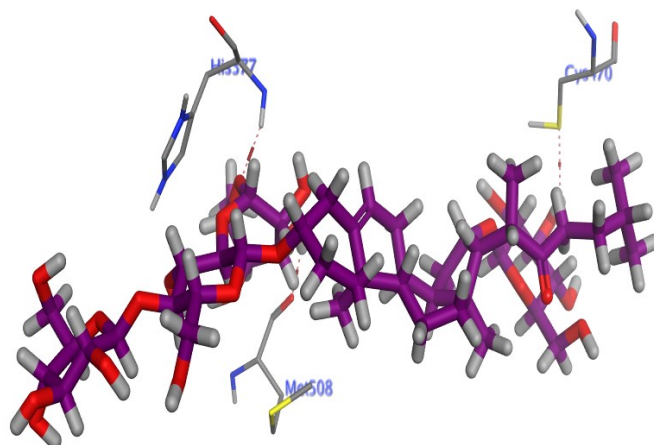

### 3D interactions of **1** with *Candida albicans* oxidoreductases

Entry: 6/10  
mol:

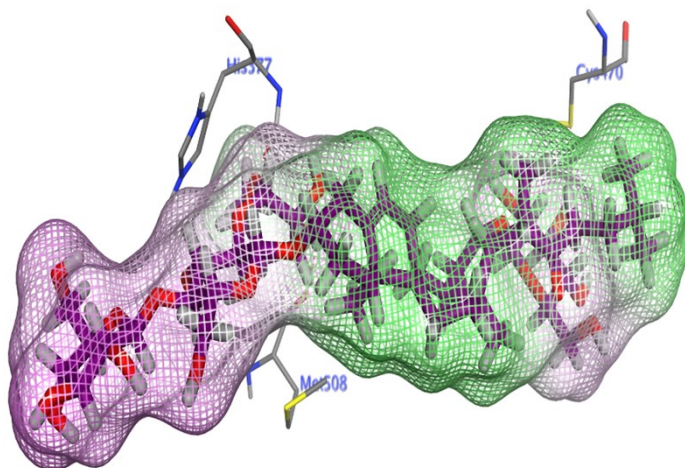

### Positioning of **1** in *Candida albicans* oxidoreductases

### 2.1.3 Compound #2

Score -4.07385206 RMSD 1.78011239

Ligand Interactions Report

Tue Dec 14 08:58:21 2021 (MOE 2014.09)

5v5z prepared.pdb: OXIDOREDUCTASE/OXIDOREDUCTASE INHIBITOR / 5v5z prepared.pdb

| Ligand | Receptor       | Interaction | Distance | E (kcal/mol) |
|--------|----------------|-------------|----------|--------------|
| O 62   | O SER 378      | H-donor     | 2.78     | -2.5         |
| O 47   | OH TYR 118     | H-acceptor  | 2.85     | -1.2         |
| O 47   | NH1 ARG 381    | H-acceptor  | 2.93     | -2.8         |
| O 48   | ND1 HIS 468    | H-acceptor  | 3.35     | -0.7         |
| O 47   | 5-ring HIS 468 | H-pi        | 4.49     | -2.3         |

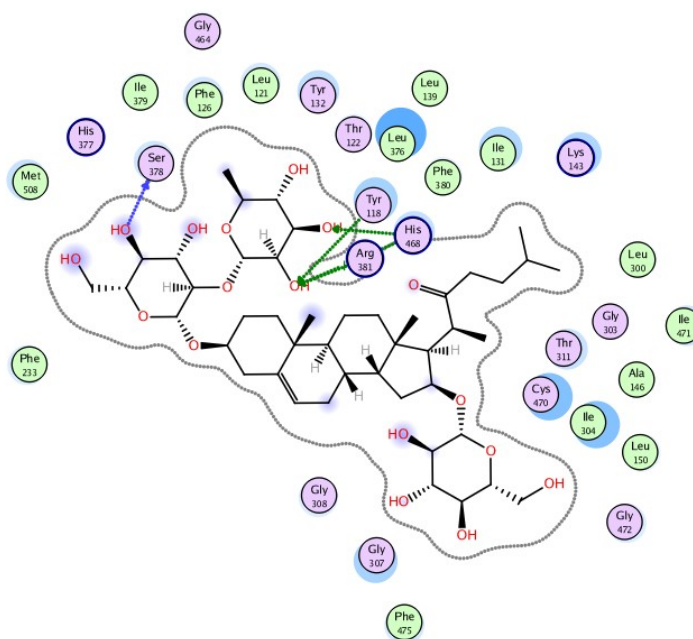

2D interactions of **2** with *Candida albicans* oxidoreductases

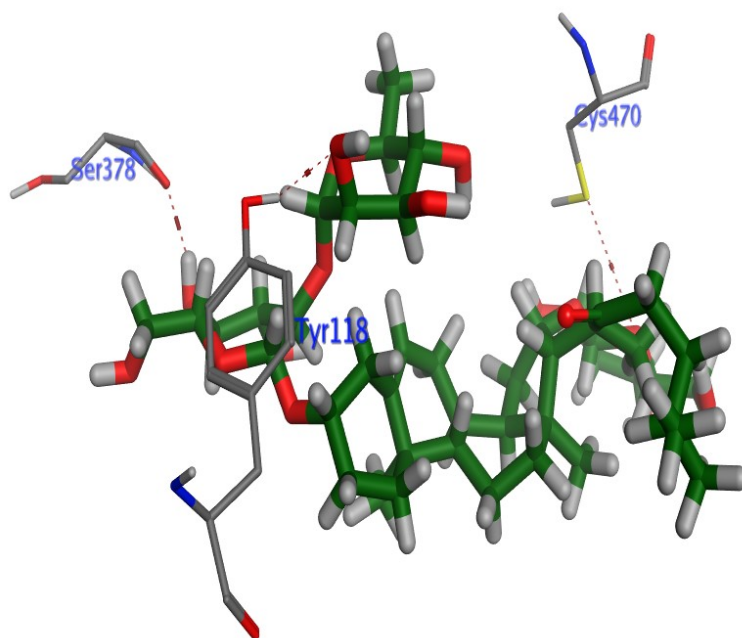

3D interactions of **2** with *Candida albicans* oxidoreductases

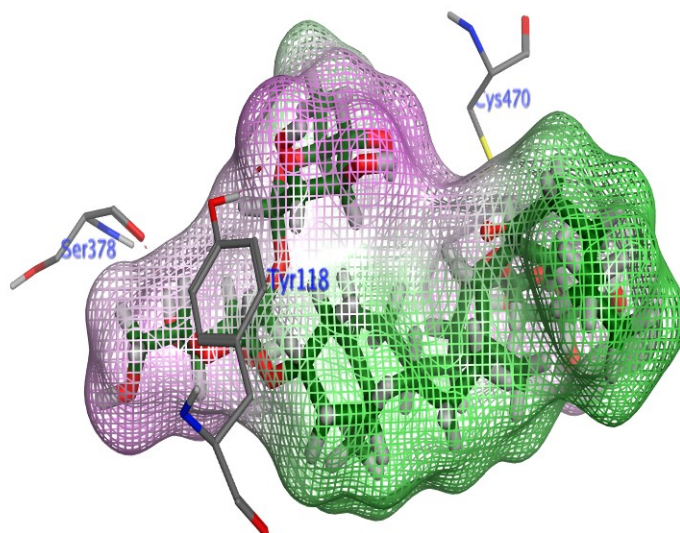

Positioning of **2** in *Candida albicans* oxidoreductases

### 2.1.4 Compound #3

Score -10.7376976 RMSD 1.91103399

Ligand Interactions Report

Tue Dec 14 09:27:57 2021 (MOE 2014.09)

5v5z prepared.pdb: OXIDOREDUCTASE/OXIDOREDUCTASE INHIBITOR / 5v5z prepared.pdb

| Ligand | Receptor   | Interaction | Distance | E (kcal/mol) |
|--------|------------|-------------|----------|--------------|
| O 33   | SG CYS 470 | H-donor     | 3.48     | -0.9         |
| O 58   | O SER 507  | H-donor     | 3.23     | -0.7         |
| O 59   | O SER 378  | H-donor     | 3.04     | -1.1         |
| O 63   | NZ LYS 143 | H-acceptor  | 3.54     | -0.8         |

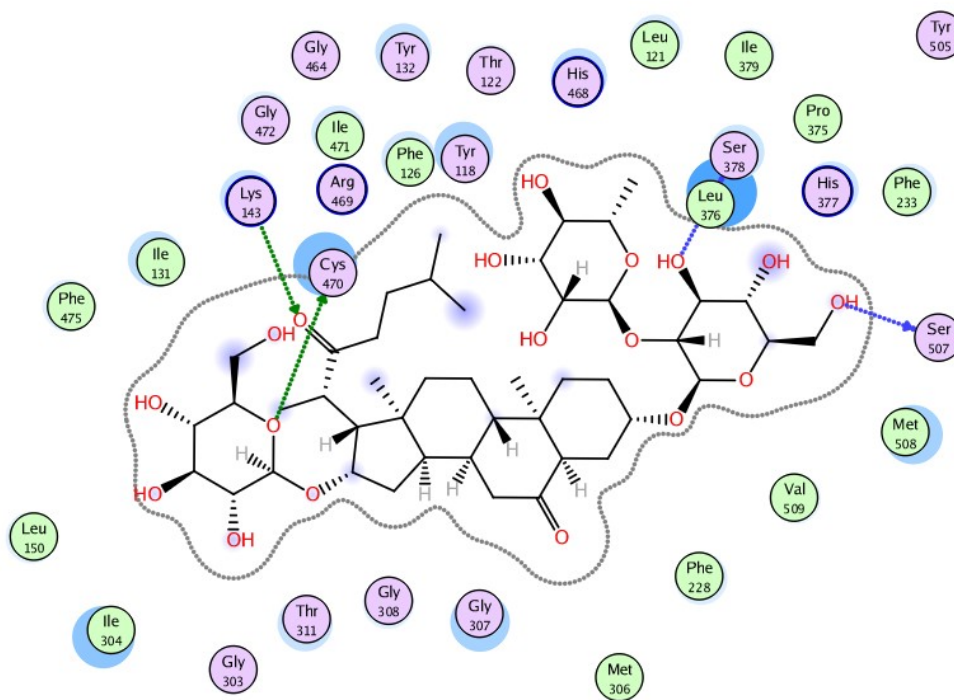

2D interactions of **3** with *Candida albicans* oxidoreductases

Entry: 2/10  
mol:

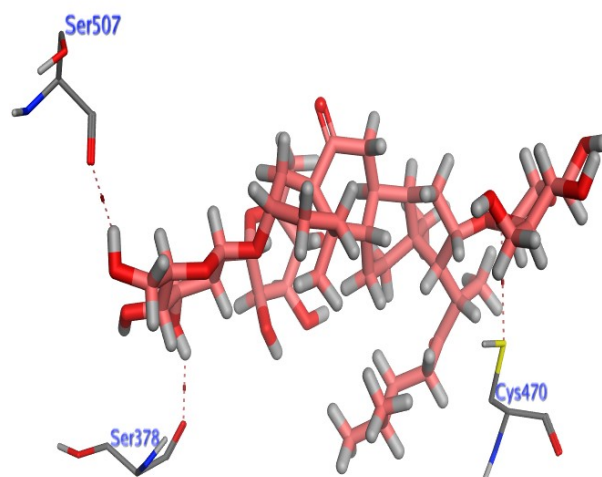

3D interactions of **3** with *Candida albicans* oxidoreductases

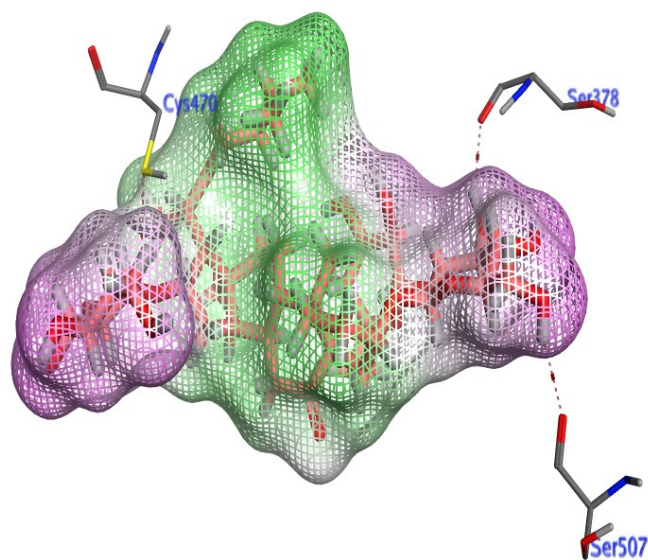

Positioning of **3** in *Candida albicans* oxidoreductases

### 2.1.5 Compound #4

Score -11.3269691 RMSD 1.73269594

Ligand Interactions Report

Mon Sep 20 22 09:41:19 2021 (MOE 2014.09)

5v5z prepared.pdb: OXIDOREDUCTASE/OXIDOREDUCTASE INHIBITOR / 5v5z prepared.pdb

Ligand Receptor Interaction Distance E (kcal/mol)

|   |    |        |     |     |            |      |      |
|---|----|--------|-----|-----|------------|------|------|
| O | 57 | O      | GLY | 303 | H-donor    | 2.76 | -1.1 |
| O | 66 | SG     | CYS | 470 | H-donor    | 3.39 | -1.5 |
| O | 68 | CA     | GLY | 308 | H-acceptor | 3.13 | -0.5 |
| C | 21 | 5-ring | HIS | 377 | H-pi       | 4.04 | -0.7 |

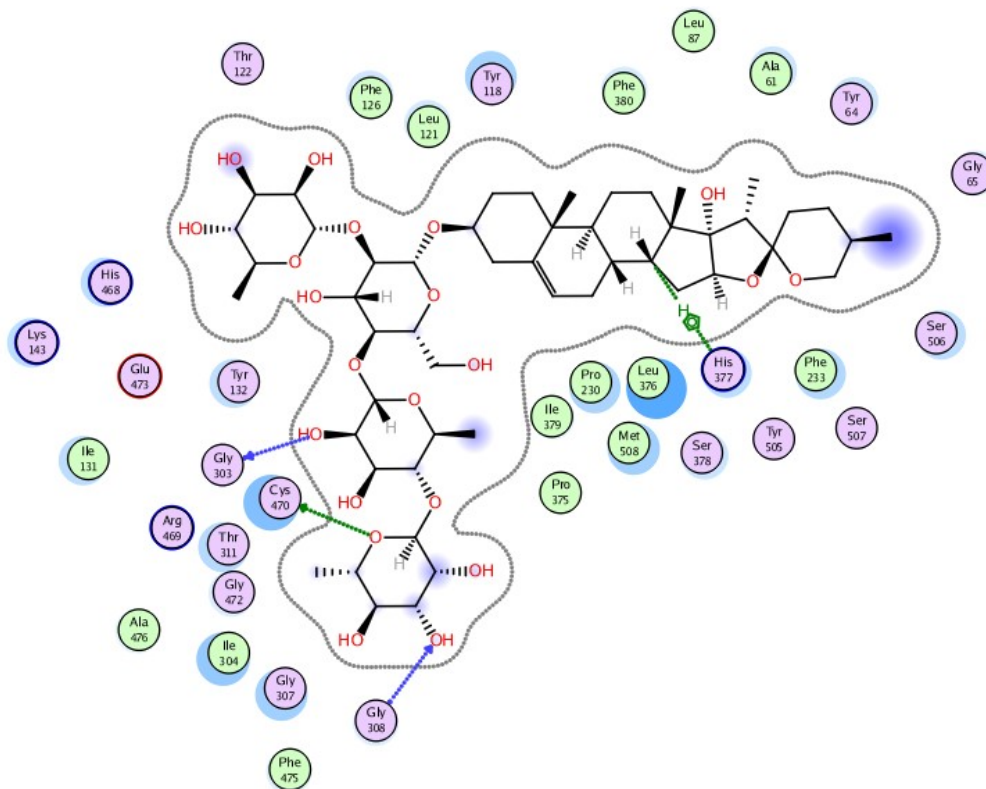

2D interactions of **4** with *Candida albicans* oxidoreductases



Entry: 3/29  
mol:

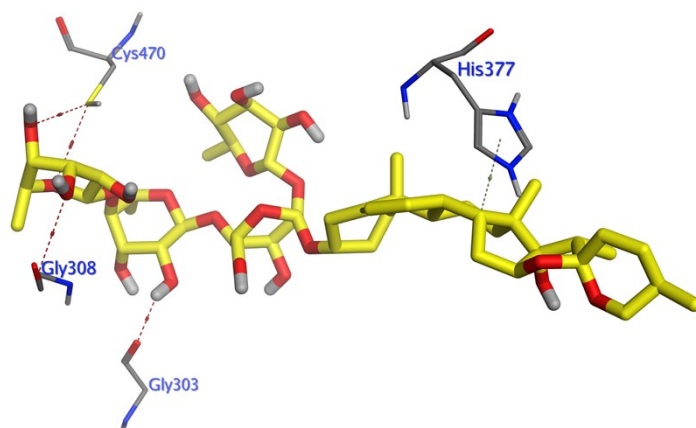

3D interactions of **4** with *Candida albicans* oxidoreductases

Entry: 3/30  
mol:

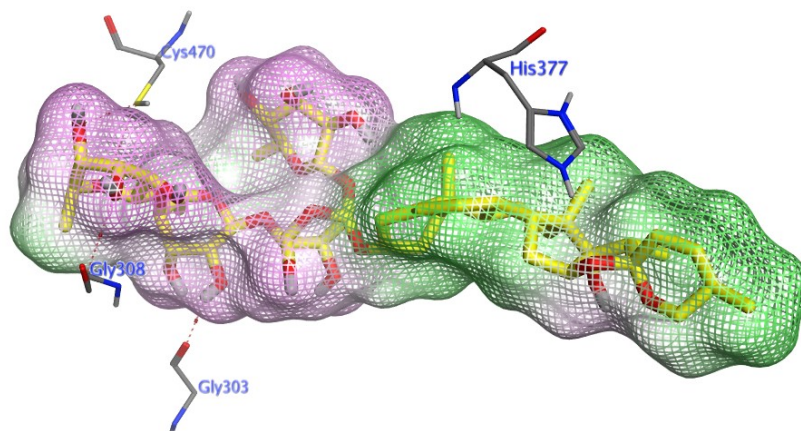

Positioning of **4** with *Candida albicans* oxidoreductases

### 2.1.6 Compound #5

Score -9.89089775 RMSD 1.59490478

Ligand Interactions Report

Wed Sep 22 12:00:06 2021 (MOE 2014.09)

5v5z prepared.pdb: OXIDOREDUCTASE/OXIDOREDUCTASE INHIBITOR / 5v5z prepared.pdb

Ligand Receptor Interaction Distance E (kcal/mol)

|   |    |        |     |     |            |      |      |
|---|----|--------|-----|-----|------------|------|------|
| O | 36 | O      | GLY | 303 | H-donor    | 2.84 | -1.5 |
| O | 49 | O      | HIS | 468 | H-donor    | 2.84 | -2.7 |
| O | 60 | SG     | CYS | 470 | H-donor    | 3.15 | -1.4 |
| O | 60 | CA     | GLY | 472 | H-acceptor | 3.29 | -0.5 |
| C | 27 | 6-ring | TYR | 118 | H-pi       | 4.61 | -0.6 |

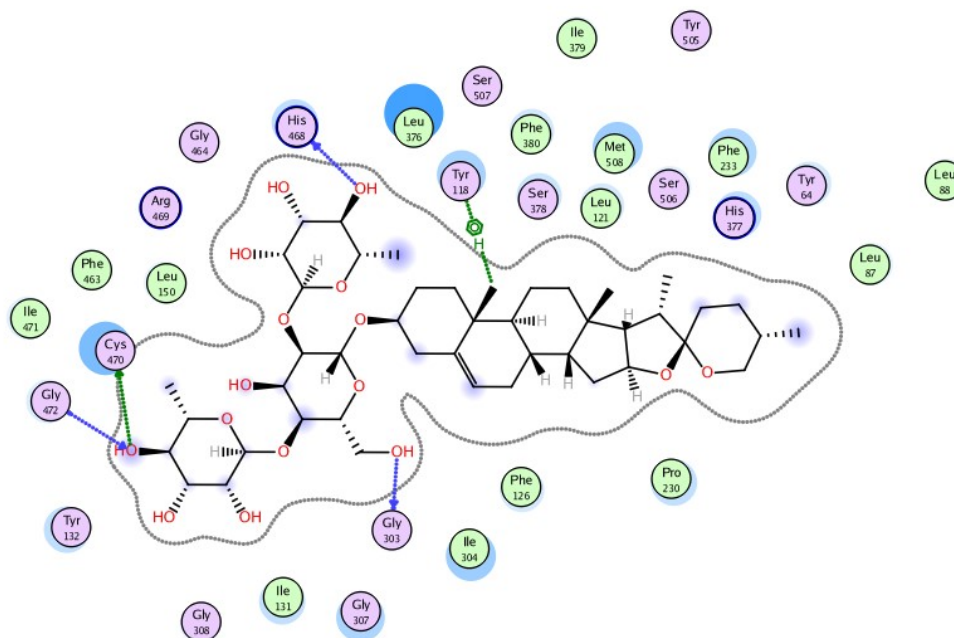

2D interactions of **5** with *Candida albicans* oxidoreductases



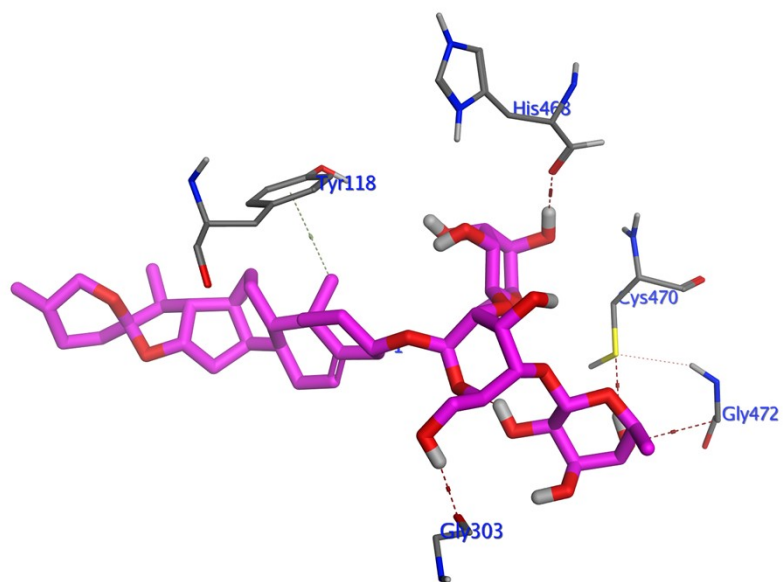

3D interactions of **5** with *Candida albicans* oxidoreductases

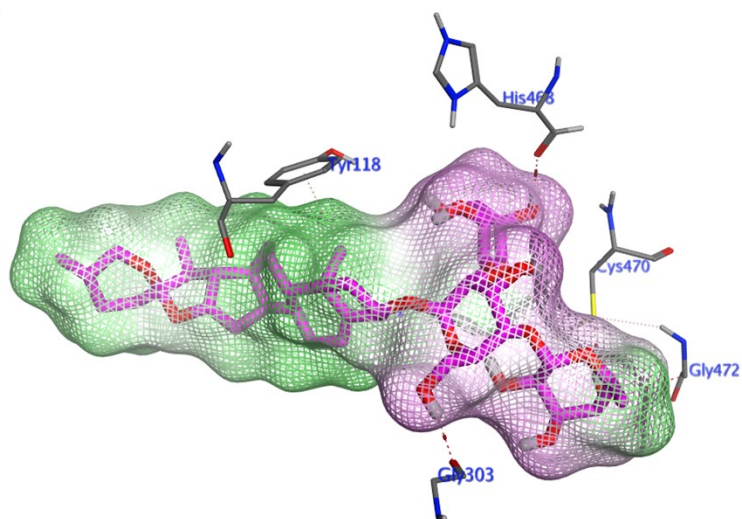

Positioning of **5** with *Candida albicans* oxidoreductases

### 2.1.7 Compound #6

Score -13.4313364 RMSD 1.56254482

Ligand Interactions Report

Wed Sep 22 12:24:44 2021 (MOE 2014.09)

5v5z prepared.pdb: OXIDOREDUCTASE/OXIDOREDUCTASE INHIBITOR / 5v5z prepared.pdb

Ligand Receptor Interaction Distance E (kcal/mol)

|   |    |    |     |     |            |      |      |
|---|----|----|-----|-----|------------|------|------|
| O | 9  | O  | HIS | 468 | H-donor    | 2.89 | -2.2 |
| O | 69 | SG | CYS | 470 | H-donor    | 3.28 | -1.3 |
| O | 8  | OH | TYR | 118 | H-acceptor | 2.92 | -1.4 |
| O | 69 | CA | GLY | 472 | H-acceptor | 3.29 | -0.5 |

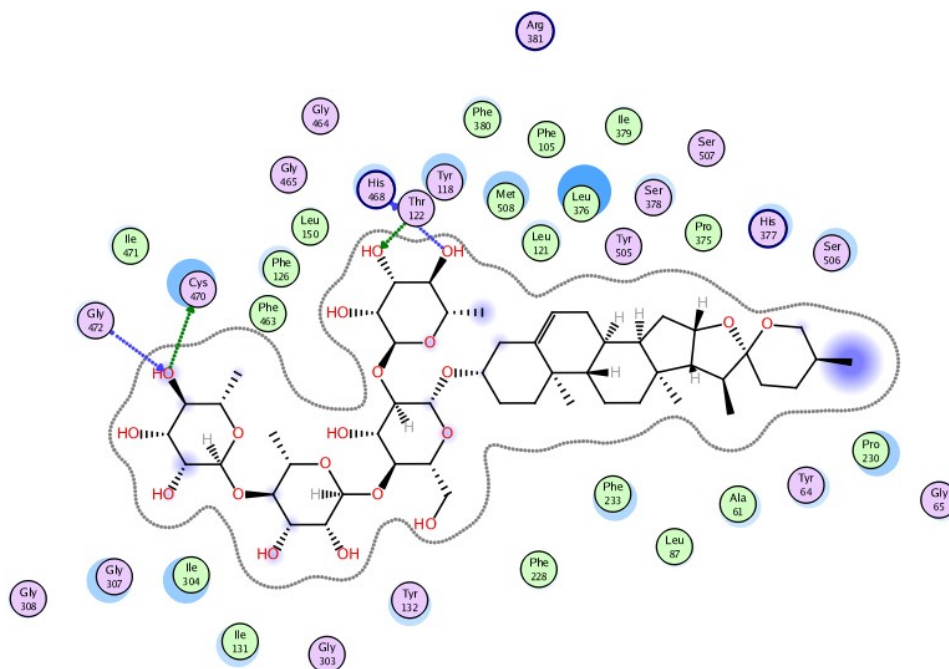

2D interactions of **6** with *Candida albicans* oxidoreductases

Entry: 1/30  
mol:

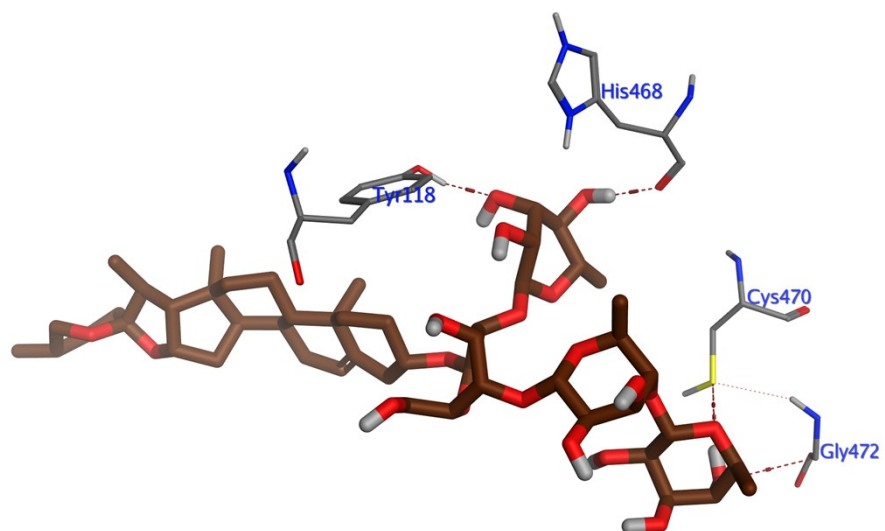

### 3D interactions of **6** with *Candida albicans* oxidoreductases

Entry: 1/30  
mol:

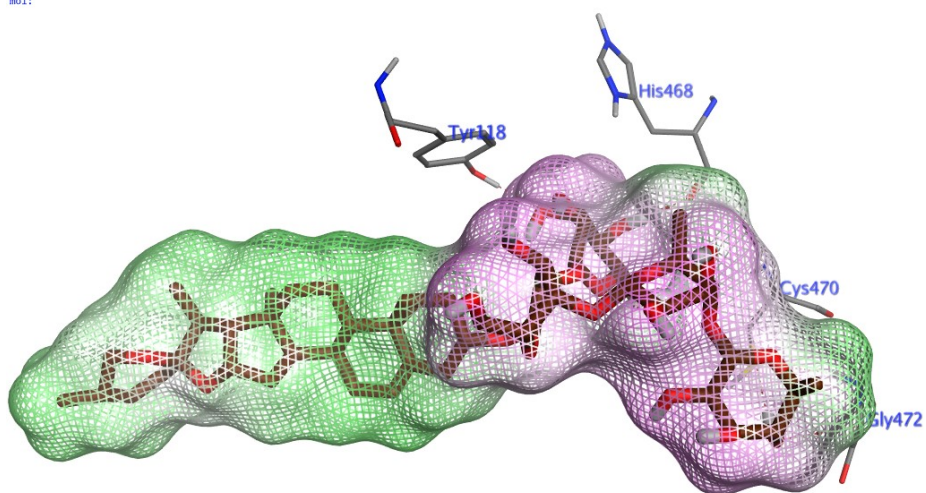

### Positioning of **6** with *Candida albicans* oxidoreductases

### 2.1.8 Compound #7

Score -9.89949226 RMSD 1.93743289

Ligand Interactions Report

Wed Sep 22 13:06:37 2021 (MOE 2014.09)

5v5z prepared.pdb: OXIDOREDUCTASE/OXIDOREDUCTASE INHIBITOR / 5v5z prepared.pdb

Ligand Receptor Interaction Distance E (kcal/mol)

|   |    |        |     |     |            |      |      |
|---|----|--------|-----|-----|------------|------|------|
| O | 8  | O      | HIS | 468 | H-donor    | 2.81 | -1.8 |
| O | 58 | SG     | CYS | 470 | H-donor    | 3.98 | -0.7 |
| O | 9  | ND1    | HIS | 468 | H-acceptor | 3.30 | -0.7 |
| C | 21 | 5-ring | HIS | 377 | H-pi       | 4.11 | -0.8 |

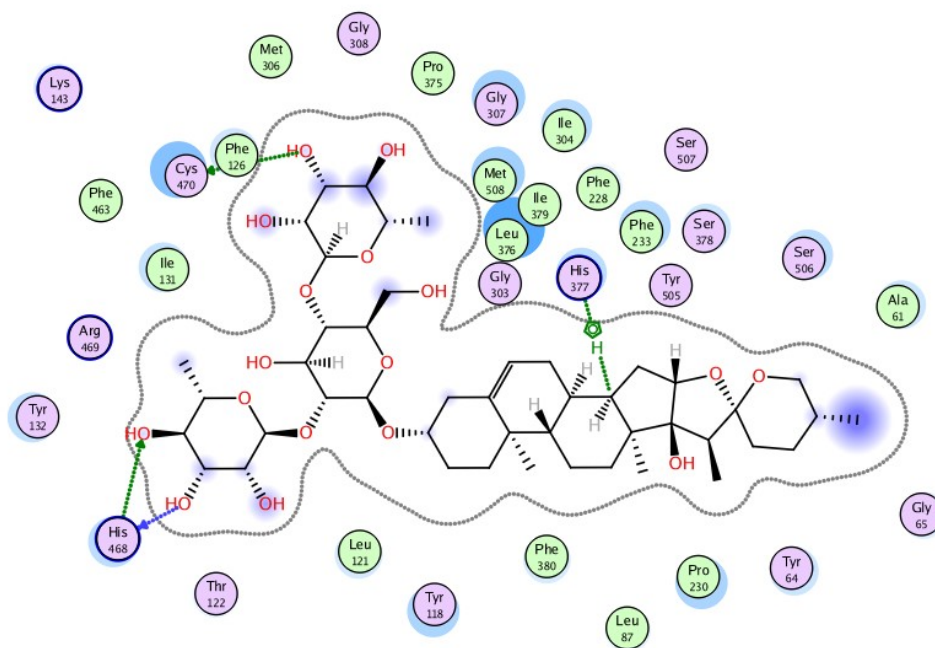

2D interactions of **7** with *Candida albicans* oxidoreductases

Entry: 4/29

mol:

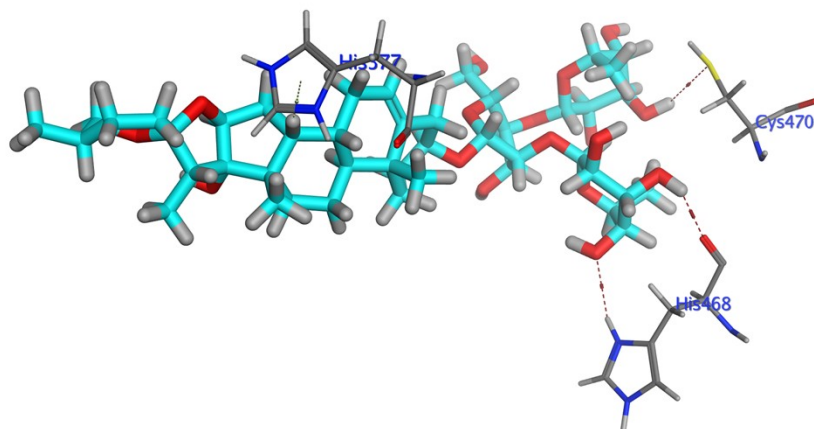

3D interactions of **7** with *Candida albicans* oxidoreductases

Entry: 4/29

mol:

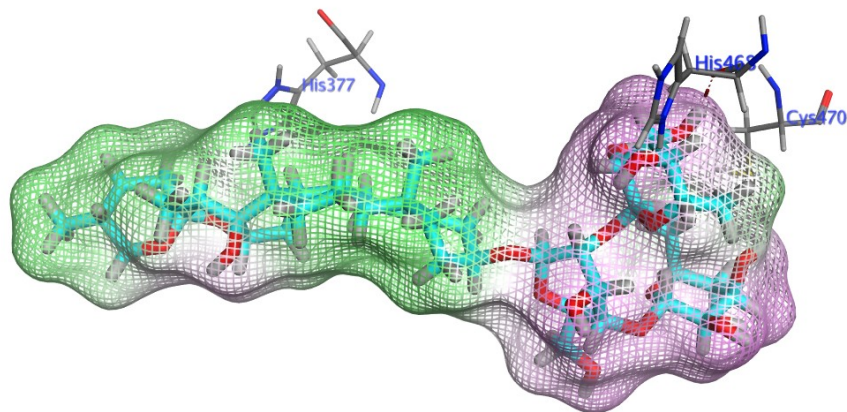

Positioning of **7** with *Candida albicans* oxidoreductases

## 2.2 Antitrypanosomal, 2JK6

### 2.2.1 FAD Redocked

Score -10.2982645      RMSD 1.61059213

Ligand Interactions Report

Mon Sep 13 10:48:44 2021 (MOE 2014.09)

2JK6: *L. Infantum* trypanothione reductase / 2JK6: trypanothione reductase

Ligand Receptor Interaction Distance E (kcal/mol)

|     |        |     |     |     |     |            |      |       |
|-----|--------|-----|-----|-----|-----|------------|------|-------|
| O3B | 13     | OD2 | ASP | 35  | (A) | H-donor    | 2.43 | 5.3   |
| O2B | 17     | OD1 | ASP | 35  | (A) | H-donor    | 2.78 | -4.5  |
| N6A | 27     | O   | GLY | 127 | (A) | H-donor    | 2.85 | -3.6  |
| O3' | 71     | OD1 | ASP | 327 | (A) | H-donor    | 2.47 | 2.4   |
| O2A | 2      | OG1 | THR | 51  | (A) | H-acceptor | 2.35 | 23.6  |
| O1A | 3      | N   | SER | 14  | (A) | H-acceptor | 3.46 | -1.7  |
| O1A | 3      | N   | THR | 51  | (A) | H-acceptor | 2.84 | -6.5  |
| N1A | 30     | N   | GLY | 127 | (A) | H-acceptor | 2.78 | -3.7  |
| O2  | 37     | N   | THR | 335 | (A) | H-acceptor | 2.69 | -4.7  |
| O4  | 41     | NZ  | LYS | 60  | (A) | H-acceptor | 2.64 | -3.9  |
| N5  | 43     | NZ  | LYS | 60  | (A) | H-acceptor | 2.82 | -10.5 |
| O1P | 82     | N   | GLY | 15  | (A) | H-acceptor | 2.58 | -2.5  |
| O2P | 83     | N   | ASP | 327 | (A) | H-acceptor | 2.67 | -4.0  |
|     | 6-ring | CB  | CYS | 57  | (A) | pi-H       | 3.68 | -0.8  |
|     | 6-ring | CE2 | TYR | 198 | (A) | pi-H       | 3.98 | -1.2  |
|     | 6-ring | OH  | TYR | 198 | (A) | pi-H       | 4.15 | -2.9  |

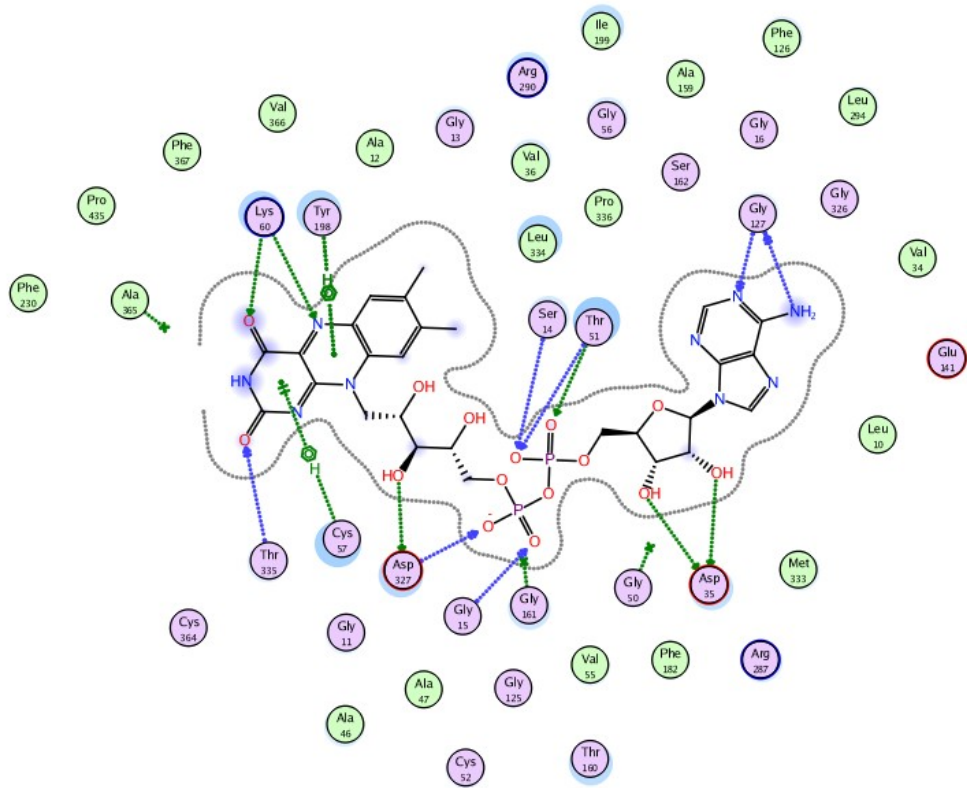

2D interactions of **FAD** with *Leishmania infantum* trypanothione reductase

ResNo: 1/30  
res:

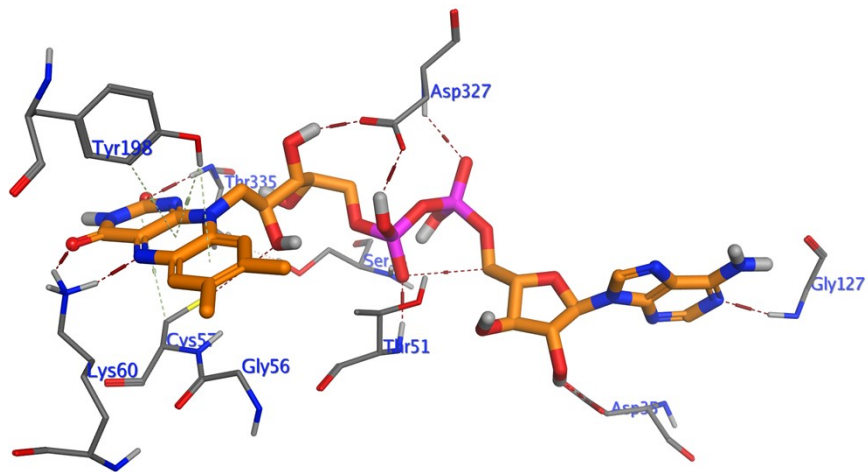

3D interactions of **FAD** with *Leishmania infantum* trypanothione reductase



bioRxiv preprint doi: <https://doi.org/10.1101/111111>; this version posted May 1, 2018. The copyright holder for this preprint (which was not certified by peer review) is the author/funder, who has granted bioRxiv a license to display the preprint in perpetuity. It is made available under aCC-BY-NC-ND 4.0 International license.

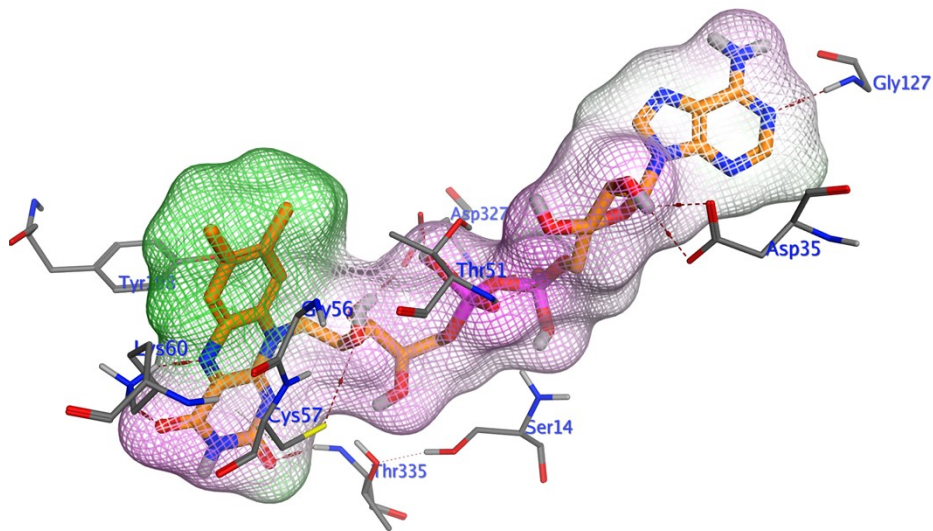

Positioning of **FAD** with *Leishmania infantum* trypanothione reductase

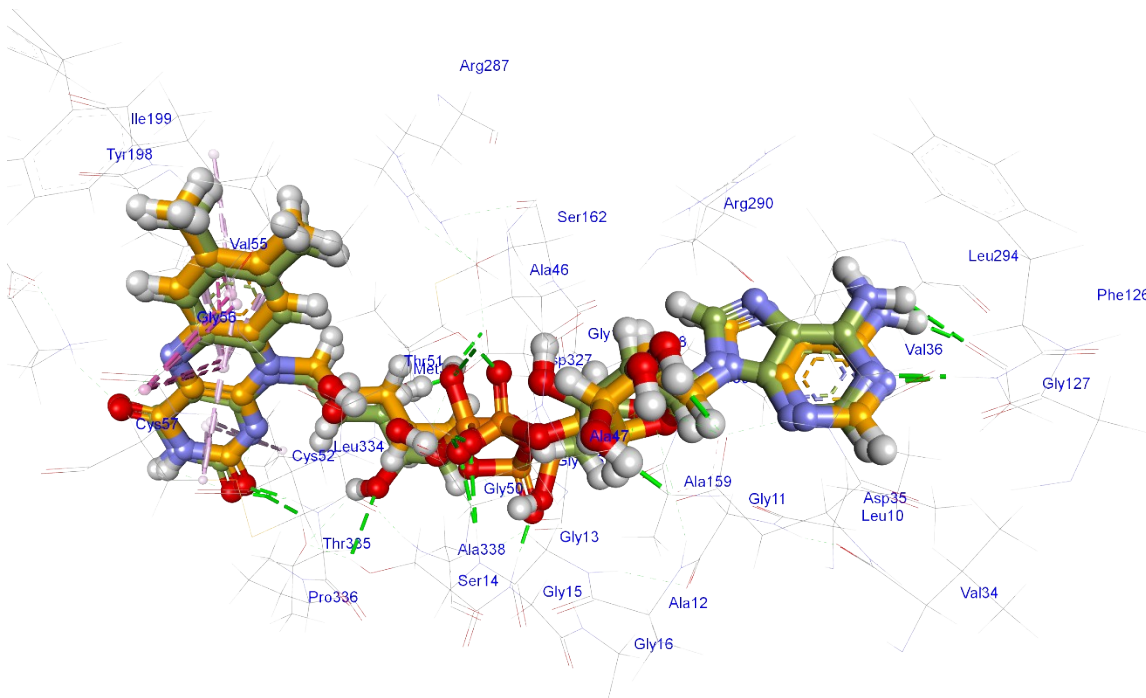

Superimposition of the re-docked **FAD** conformer (golden) over that of the co-crystallized one (green) with RMSD value of 1.61



## 2.2.2 Compound #1

Score 22.1789684 RMSD 1.60361874

Ligand Interactions Report

Tue Dec 14 10:03:47 2021 (MOE 2014.09)

2jk6 prepared.pdb: *L. Infantum* trypanothione reductase / 2jk6 prepared.pdb

| Ligand | Receptor | Interaction Distance | E (kcal/mol) |
|--------|----------|----------------------|--------------|
|--------|----------|----------------------|--------------|

|      |             |         |           |
|------|-------------|---------|-----------|
| O 39 | OD2 ASP 327 | H-donor | 3.16 -1.6 |
|------|-------------|---------|-----------|

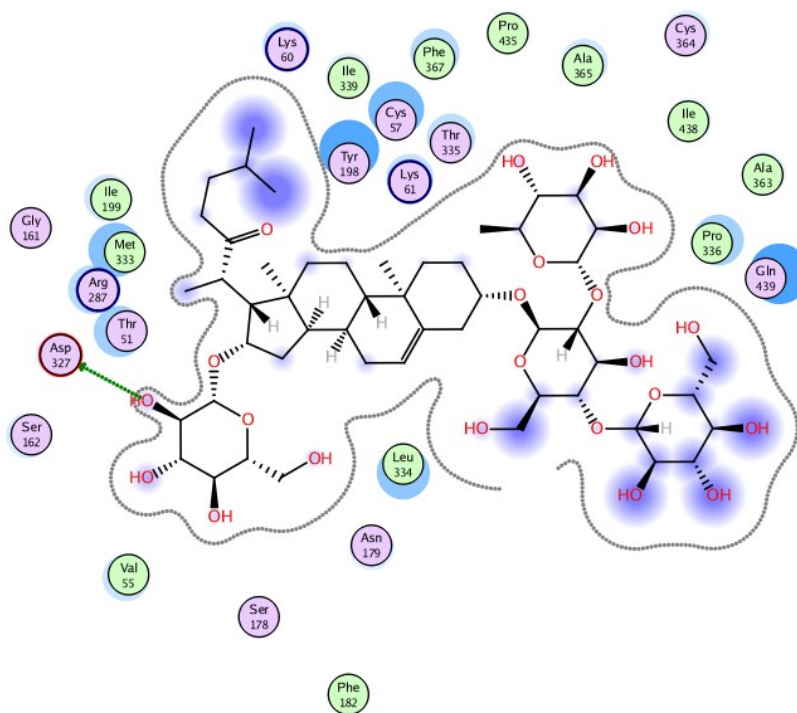

2D interactions of **1** with *Leishmania infantum* trypanothione reductase

Entry: 7/9  
mol:

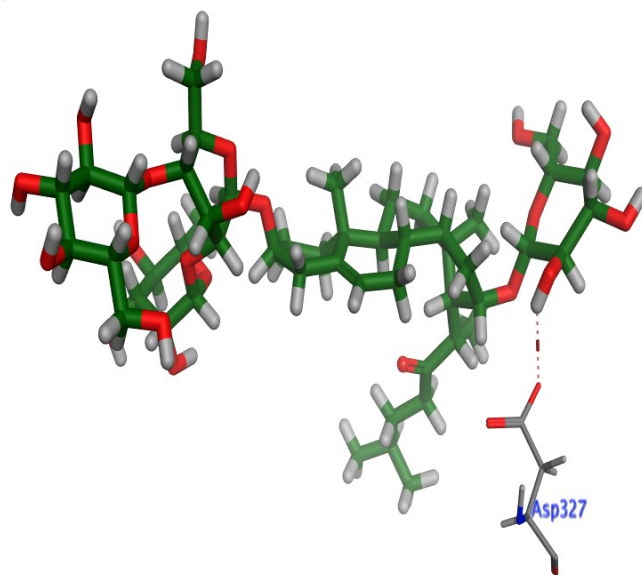

### 3D interactions of **1** with *Leishmania infantum* trypanothione reductase

Entry: 7/9  
mol:

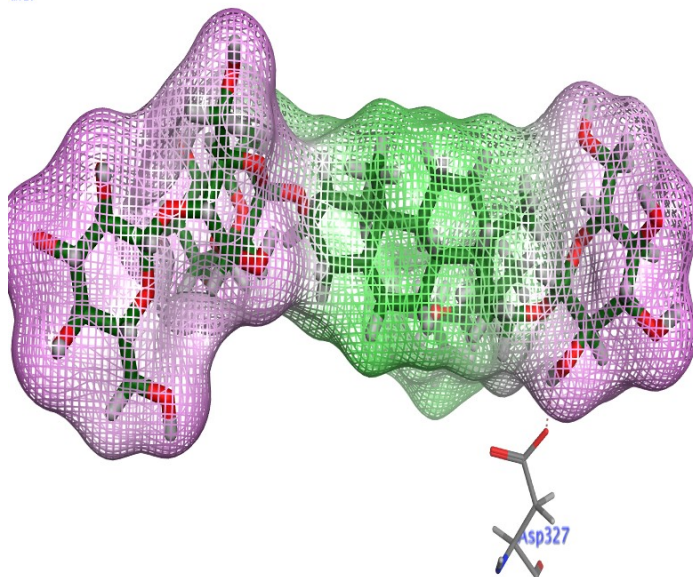

### Positioning of **1** in *Leishmania infantum* trypanothione reductase

### 2.2.3 Compound #2

Score 13.7332754

RMSD 1.60623026

#### Ligand Interactions Report

Tue Dec 14 19:44:12 2021 (MOE 2014.09)

2jk6 prepared.pdb: *L. Infantum* trypanothione reductase / 2jk6 prepared.pdb

| Ligand | Receptor    | Interaction | Distance | E (kcal/mol) |
|--------|-------------|-------------|----------|--------------|
| O 39   | OD1 ASP 327 | H-donor     | 2.52     | -1.4         |
| O 47   | O ALA 365   | H-donor     | 2.44     | -0.2         |
| O 48   | SG CYS 364  | H-donor     | 3.70     | -1.2         |
| O 40   | CA GLY 13   | H-acceptor  | 3.02     | -1.0         |
| O 60   | CA CYS 364  | H-acceptor  | 3.26     | -0.6         |

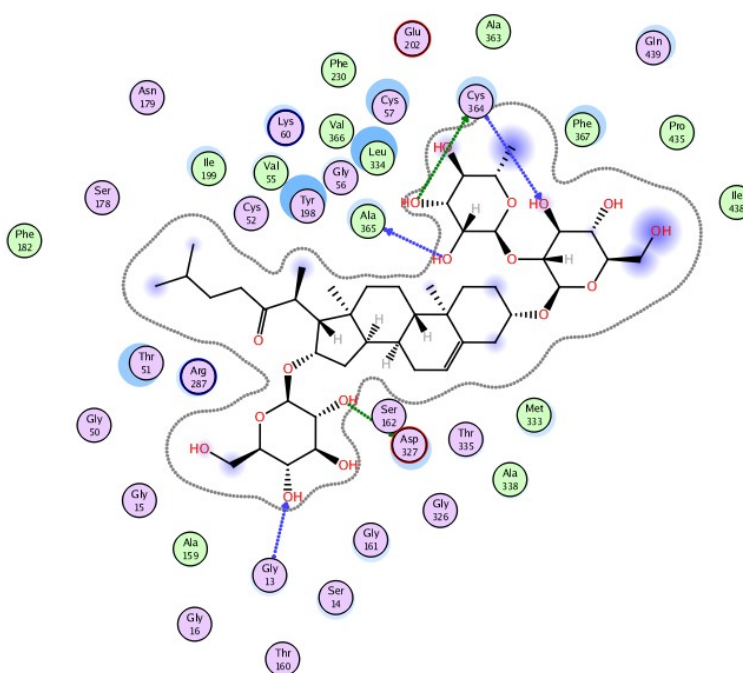

2D interactions of **2** with *Leishmania infantum* trypanothione reductase

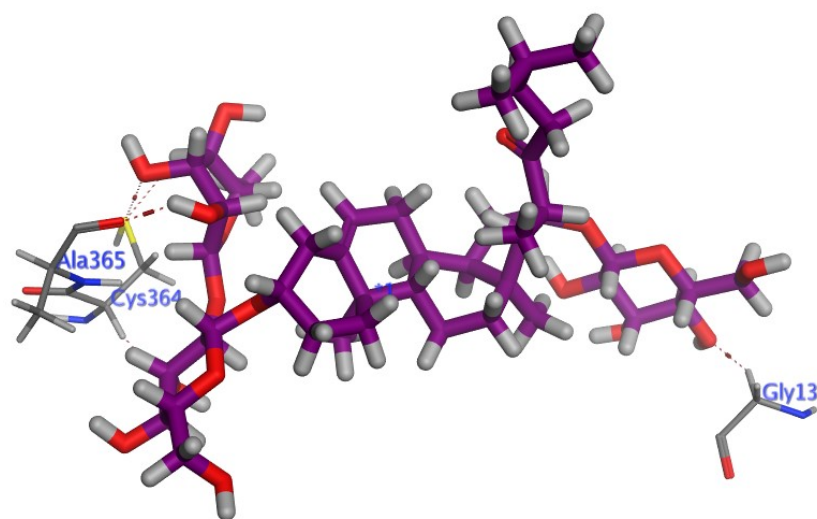

3D interactions of **2** with *Leishmania infantum* trypanothione reductase

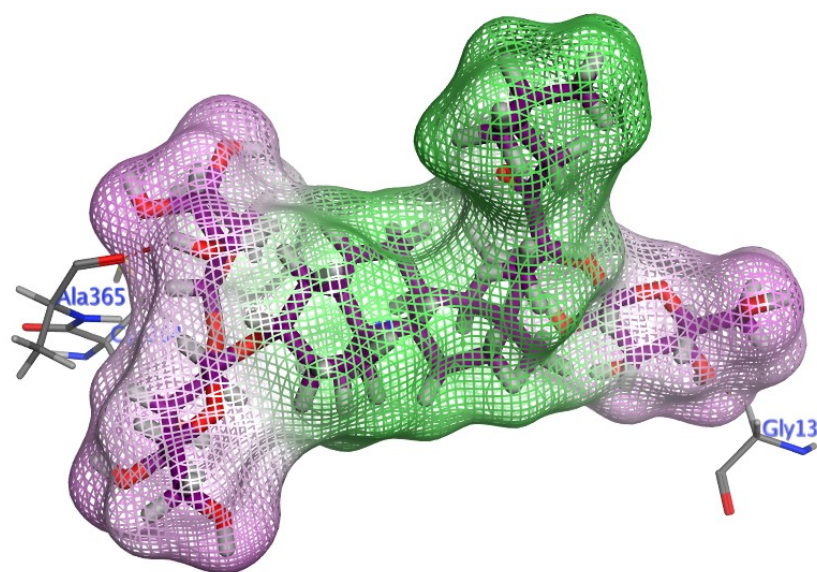

Positioning of **2** in *Leishmania infantum* trypanothione reductase

### 2.2.4 Compound #3

Score 1.48917317

RMSD 1.73117518

#### Ligand Interactions Report

Tue Dec 14 19:44:12 2021 (MOE 2014.09)

2jk6 prepared.pdb: *L. Infantum* trypanothione reductase / 2jk6 prepared.pdb

| Ligand | Receptor    | Interaction | Distance | E (kcal/mol) |
|--------|-------------|-------------|----------|--------------|
| O 39   | O VAL 55    | H-donor     | 2.50     | 0.2          |
| O 63   | SG CYS 57   | H-donor     | 3.25     | -0.4         |
| O 36   | OG SER 178  | H-acceptor  | 2.83     | 0.8          |
| O 45   | NE2 GLN 439 | H-acceptor  | 2.46     | 2.5          |

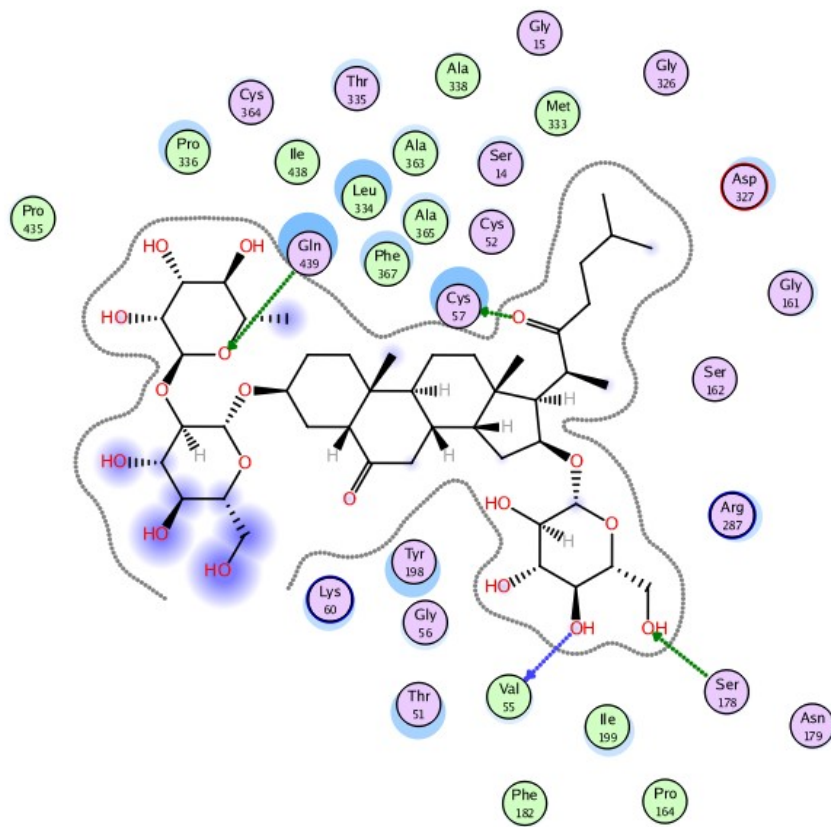

2D interactions of **3** with *Leishmania infantum* trypanothione reductase



Entry: 7/10  
mol:

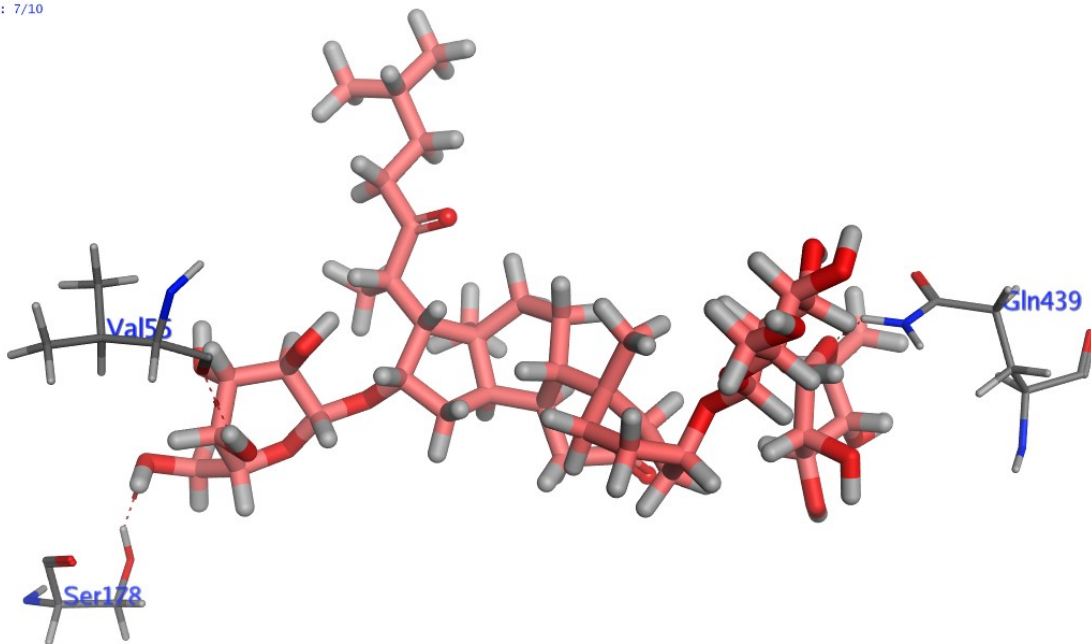

3D interactions of **3** with *Leishmania infantum* trypanothione reductase

Entry: 7/10  
mol:

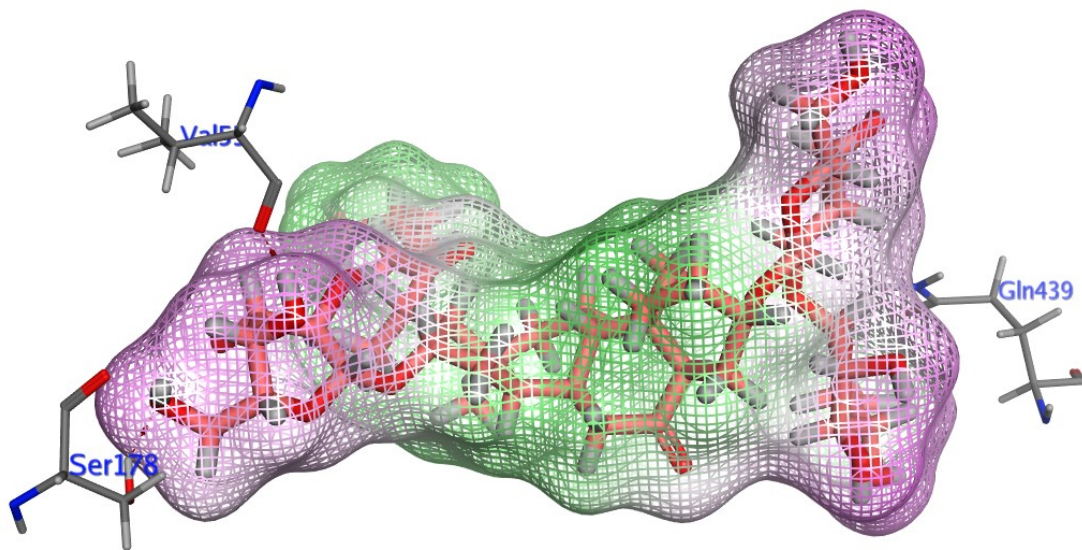

Positioning of **3** in *Leishmania infantum* trypanothione reductase

### 2.2.5 Compound #4

Score -4.41324139

RMSD 1.67518234

Ligand Interactions Report

Mon Sep 13 12:02:51 2021 (MOE 2014.09)

2JK6: *L. Infantum* trypanothione reductase / 2JK6

Ligand Receptor Interaction Distance E (kcal/mol)

|   |    |     |     |     |     |            |      |      |
|---|----|-----|-----|-----|-----|------------|------|------|
| O | 8  | O   | VAL | 55  | (A) | H-donor    | 2.68 | -2.3 |
| O | 42 | SG  | CYS | 57  | (A) | H-donor    | 3.52 | -0.7 |
| O | 46 | OD1 | ASP | 327 | (A) | H-donor    | 2.67 | -1.1 |
| C | 55 | SG  | CYS | 57  | (A) | H-donor    | 3.62 | -0.9 |
| O | 6  | OH  | TYR | 198 | (A) | H-acceptor | 2.94 | -1.6 |
| O | 7  | CA  | GLY | 56  | (A) | H-acceptor | 2.84 | -0.9 |
| O | 8  | CA  | GLY | 56  | (A) | H-acceptor | 2.92 | -0.3 |
| O | 56 | N   | THR | 335 | (A) | H-acceptor | 2.82 | -3.4 |
| O | 72 | CD  | ARG | 290 | (A) | H-acceptor | 3.21 | -0.5 |

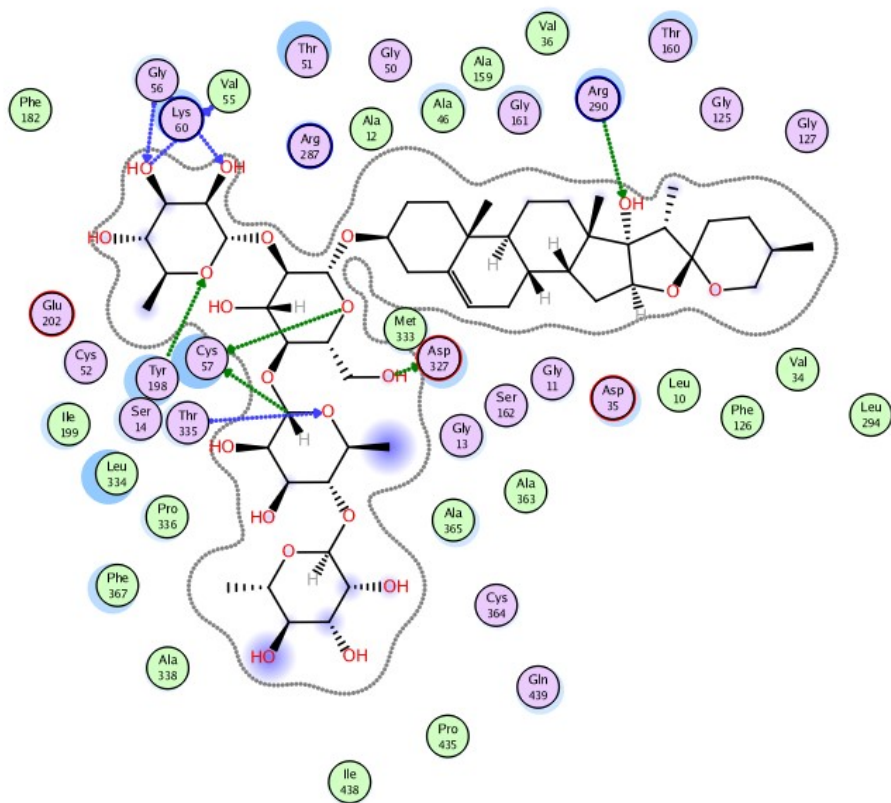

2D interactions of **4** with *Leishmania infantum* trypanothione reductase

RDKit 5.1.0

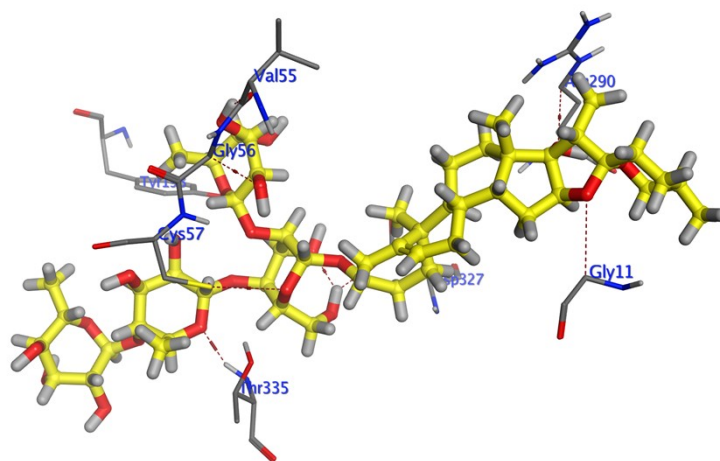

3D interactions of **4** with *Leishmania infantum* trypanothione reductase



bioRxiv preprint doi: <https://doi.org/10.1101/000000>; this version posted May 1, 2014. The copyright holder for this preprint (which was not certified by peer review) is the author/funder, who has granted bioRxiv a license to display the preprint in perpetuity. It is made available under aCC-BY-NC-ND 4.0 International license.

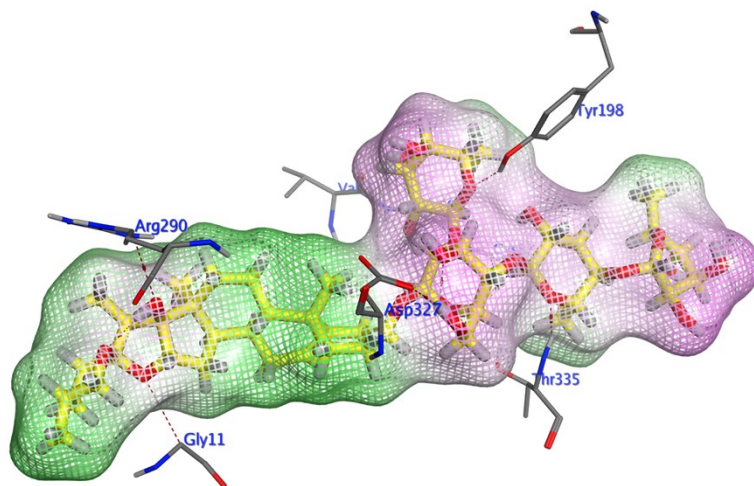

Positioning of **4** with *Leishmania infantum* trypanothione reductase

## 2.2.6 Compound #5

Score -0.789431393 RMSD 1.46603882

Ligand Interactions Report

Fri Sep 17 14:47:34 2021 (MOE 2014.09)

2jk6 prepared.pdb: *L. Infantum* trypanothione reductase / 2jk6 prepared.pdb

Ligand Receptor Interaction Distance E (kcal/mol)

|   |    |    |     |     |            |      |      |
|---|----|----|-----|-----|------------|------|------|
| O | 47 | SG | CYS | 52  | H-donor    | 3.34 | -0.9 |
| O | 47 | SG | CYS | 57  | H-donor    | 3.10 | -1.1 |
| O | 60 | O  | PRO | 435 | H-donor    | 2.75 | -2.2 |
| O | 18 | N  | THR | 51  | H-acceptor | 3.04 | -3.0 |
| O | 36 | NZ | LYS | 60  | H-acceptor | 2.63 | -1.1 |

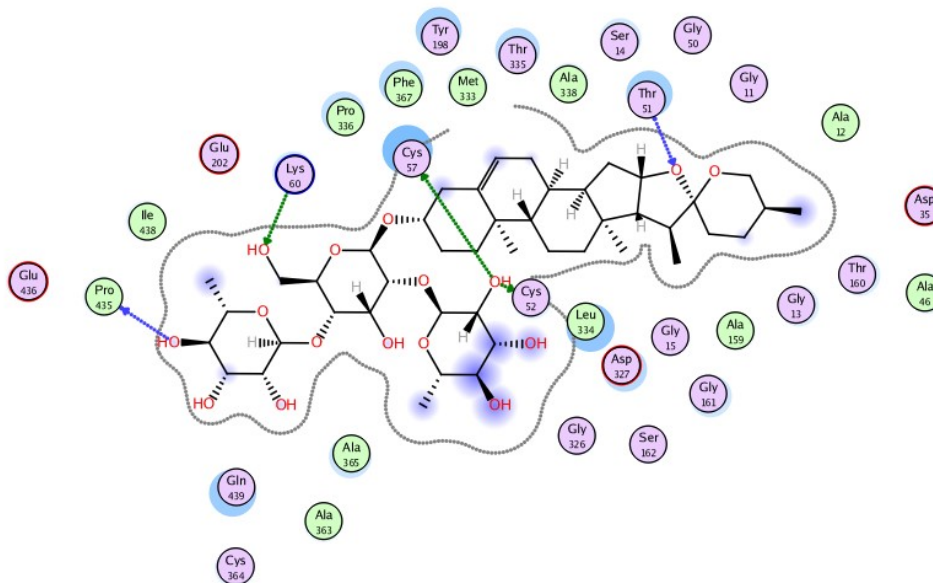

2D interactions of **5** with *Leishmania infantum* trypanothione reductase

ResNo: 1/10  
mol:

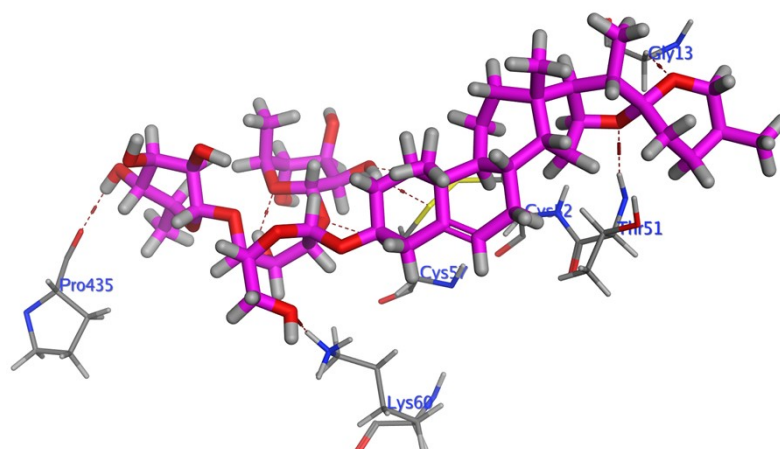

3D interactions of **5** with *Leishmania infantum* trypanothione reductase

ResNo: 1/10  
mol:

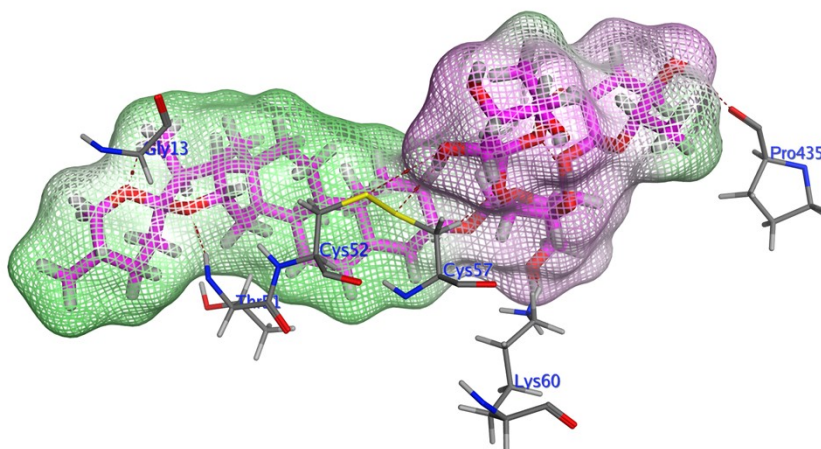

Positioning of **5** with *Leishmania infantum* trypanothione reductase

## 2.2.7 Compound # 6

## 2.2.8 Compound #6

Score -3.72905278 RMSD 1.97958124

Ligand Interactions Report

Fri Sep 24 08:16:01 2021 (MOE 2014.09)

2jk6 prepared.pdb: *L. Infantum* trypanothione reductase / 2jk6 prepared.pdb

Ligand Receptor Interaction Distance E (kcal/mol)

|   |    |     |     |     |            |      |      |
|---|----|-----|-----|-----|------------|------|------|
| O | 57 | O   | ALA | 159 | H-donor    | 2.55 | -1.0 |
| O | 67 | O   | THR | 160 | H-donor    | 2.48 | -0.4 |
| O | 8  | OH  | TYR | 198 | H-acceptor | 2.94 | -0.4 |
| O | 46 | N   | GLY | 15  | H-acceptor | 3.17 | -1.8 |
| O | 60 | N   | THR | 51  | H-acceptor | 3.06 | -1.4 |
| O | 60 | OG1 | THR | 51  | H-acceptor | 2.59 | -1.1 |

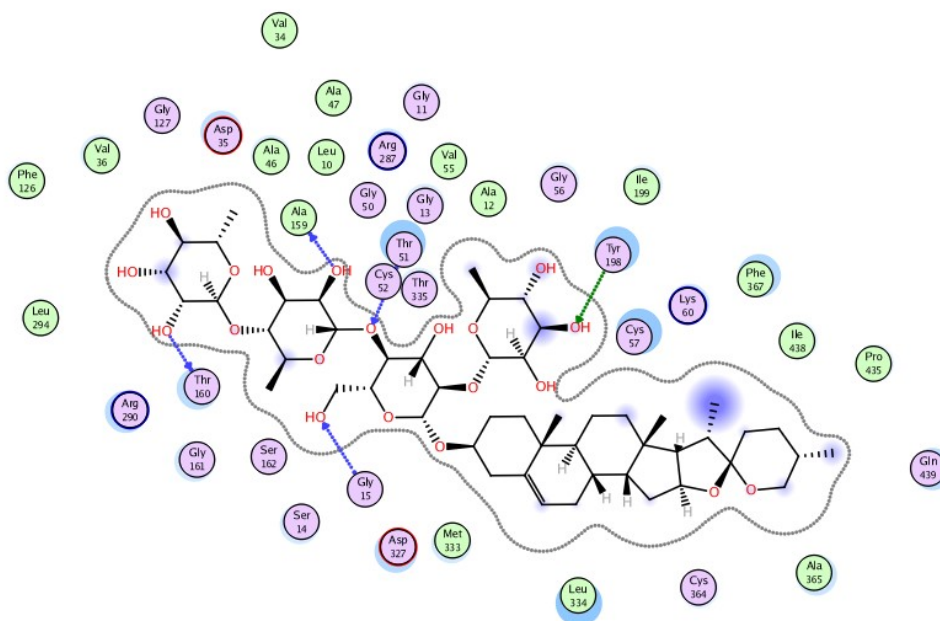

2D interactions of **6** with *Leishmania infantum* trypanothione reductase

Entry: 3/30  
mol:

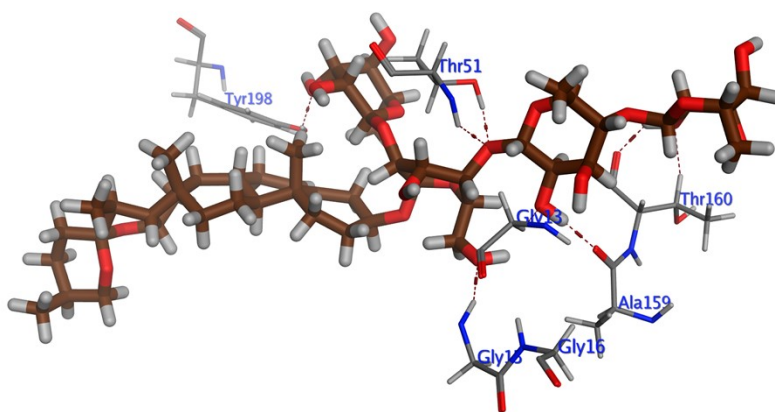

### 3D interactions of **6** with *Leishmania infantum* trypanothione reductase

Entry: 3/30  
mol:

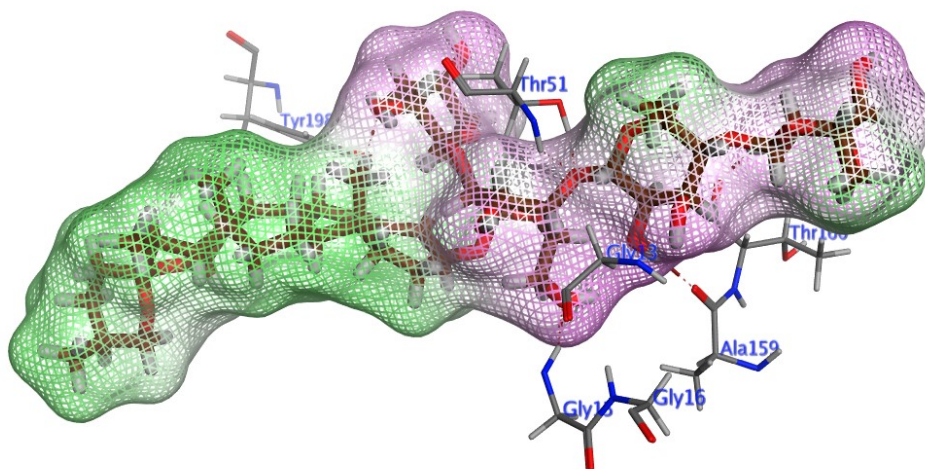

### Positioning of **6** with *Leishmania infantum* trypanothione reductase

## 2.2.9 Compound #7

Score 4.6140976 RMSD 1.61256039

Ligand Interactions Report

Fri Sep 17 19:00:31 2021 (MOE 2014.09)

2jk6 prepared.pdb: *L. Infantum* trypanothione reductase / 2jk6 prepared.pdb

Ligand Receptor Interaction Distance E (kcal/mol)

|   |    |     |     |     |            |      |      |
|---|----|-----|-----|-----|------------|------|------|
| O | 8  | O   | CYS | 57  | H-donor    | 2.90 | -1.0 |
| O | 61 | O   | PRO | 435 | H-donor    | 3.20 | -1.0 |
| O | 28 | N   | THR | 51  | H-acceptor | 2.54 | -1.9 |
| O | 47 | NZ  | LYS | 60  | H-acceptor | 2.56 | -5.7 |
| O | 58 | NE2 | GLN | 439 | H-acceptor | 3.13 | -0.7 |
| O | 62 | N   | SER | 14  | H-acceptor | 2.53 | 1.6  |

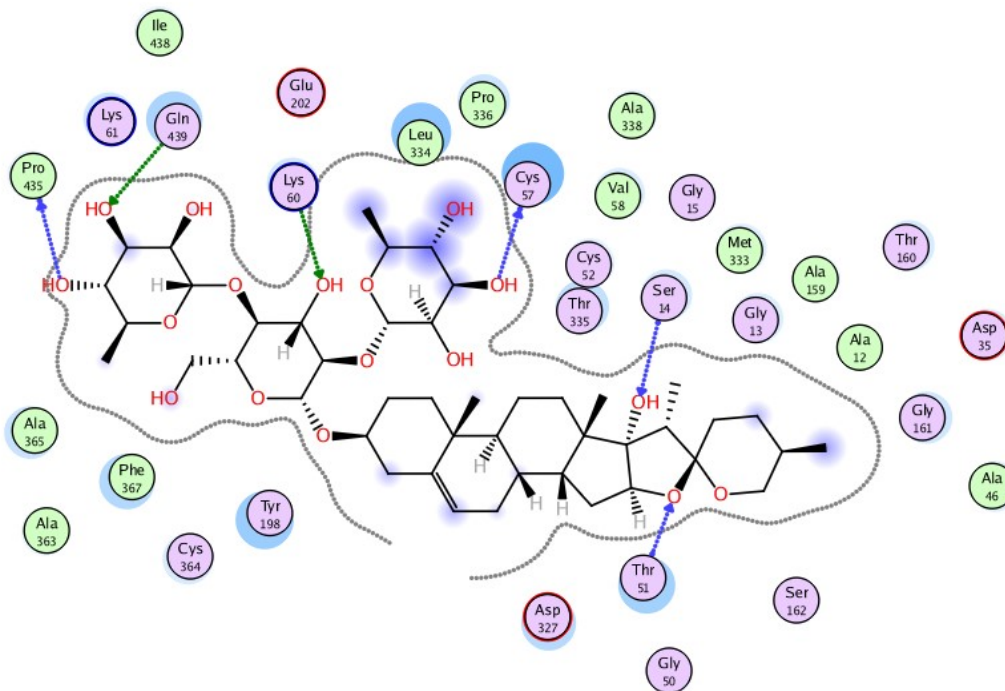

2D interactions of **7** with *Leishmania infantum* trypanothione reductase



Entry: 7/20  
mol:

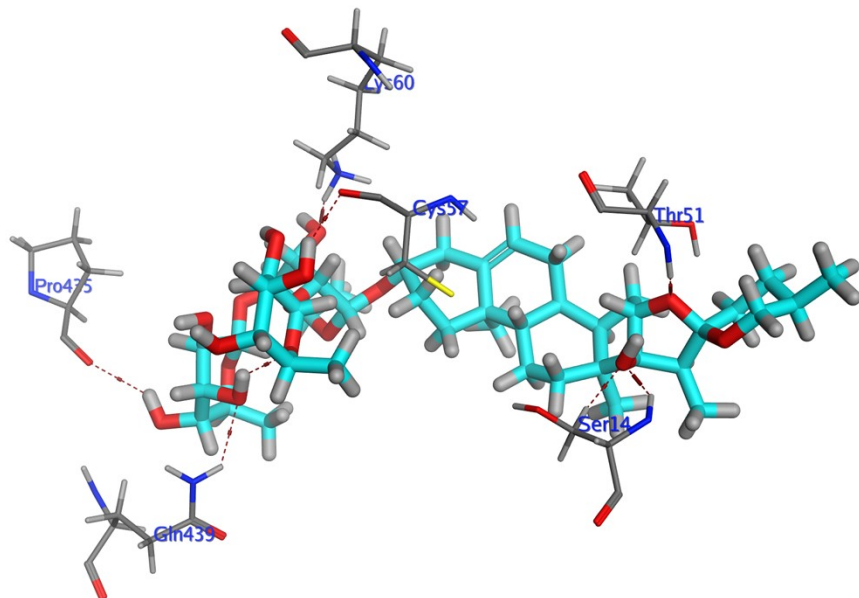

3D interactions of **7** with *Leishmania infantum* trypanothione reductase

Entry: 7/10  
mol:

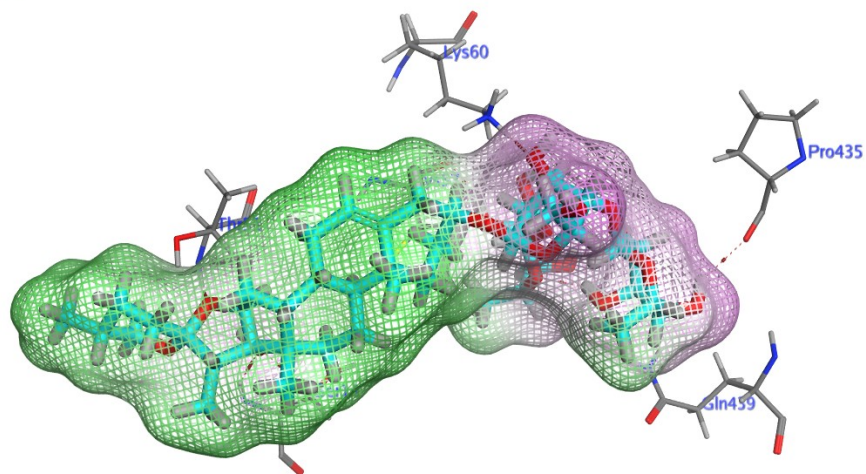

Positioning of **7** with *Leishmania infantum* trypanothione reductase



### 3 PASS online predictions

| Pa                 | Pi    |                                                                      |
|--------------------|-------|----------------------------------------------------------------------|
| <b>Compound #1</b> |       |                                                                      |
| 0,962              | 0,001 | Cholesterol antagonist                                               |
| 0,939              | 0,002 | Proliferative diseases treatment                                     |
| 0,935              | 0,003 | Caspase 3 stimulant                                                  |
| 0,915              | 0,004 | Alkenylglycerophosphocholine hydrolase inhibitor                     |
| 0,900              | 0,002 | Chemopreventive                                                      |
| 0,901              | 0,003 | Antihypercholesterolemic                                             |
| 0,883              | 0,003 | Membrane integrity antagonist                                        |
| 0,880              | 0,003 | CYP3A4 inducer                                                       |
| 0,878              | 0,005 | Antineoplastic                                                       |
| 0,875              | 0,003 | CYP3A inducer                                                        |
| 0,870              | 0,003 | Hepatoprotectant                                                     |
| 0,868              | 0,016 | CDP-glycerol glycerophosphotransferase inhibitor                     |
| 0,853              | 0,005 | Respiratory analeptic                                                |
| 0,842              | 0,004 | Anticarcinogenic                                                     |
| 0,837              | 0,004 | UDP-glucuronosyltransferase substrate                                |
| 0,825              | 0,004 | Antiprotozoal (Leishmania)                                           |
| 0,821              | 0,004 | Immunosuppressant                                                    |
| 0,816              | 0,005 | Oxidoreductase inhibitor                                             |
| 0,812              | 0,005 | Glyceryl-ether monooxygenase inhibitor                               |
| 0,786              | 0,010 | Immunostimulant                                                      |
| 0,768              | 0,009 | CYP3A5 substrate                                                     |
| 0,779              | 0,021 | CYP2H substrate                                                      |
| 0,747              | 0,003 | Dolichyl-diphosphooligosaccharide-protein glycotransferase inhibitor |
| 0,741              | 0,008 | Antifungal                                                           |
| 0,734              | 0,005 | Alkenylglycerophosphoethanolamine hydrolase inhibitor                |
| 0,738              | 0,011 | Hypolipemic                                                          |
| 0,731              | 0,021 | CYP3A substrate                                                      |
| 0,711              | 0,004 | Transcription factor NF kappa B stimulant                            |
| 0,711              | 0,004 | Transcription factor stimulant                                       |
| 0,716              | 0,010 | Glucan endo-1,3-beta-D-glucosidase inhibitor                         |
| 0,712              | 0,006 | Anesthetic general                                                   |
| 0,726              | 0,027 | Benzoate-CoA ligase inhibitor                                        |
| 0,703              | 0,010 | Analeptic                                                            |
| <b>Compound #2</b> |       |                                                                      |

| <b>Pa</b>          | <b>Pi</b> |                                                                      |
|--------------------|-----------|----------------------------------------------------------------------|
| 0,959              | 0,001     | Cholesterol antagonist                                               |
| 0,929              | 0,002     | Proliferative diseases treatment                                     |
| 0,925              | 0,004     | Alkenylglycerophosphocholine hydrolase inhibitor                     |
| 0,922              | 0,002     | Chemopreventive                                                      |
| 0,920              | 0,003     | Antihypercholesterolemic                                             |
| 0,912              | 0,003     | Caspase 3 stimulant                                                  |
| 0,891              | 0,003     | CYP3A4 inducer                                                       |
| 0,890              | 0,003     | CYP3A inducer                                                        |
| 0,889              | 0,003     | Hepatoprotectant                                                     |
| 0,886              | 0,005     | Respiratory analeptic                                                |
| 0,872              | 0,004     | Membrane integrity antagonist                                        |
| 0,873              | 0,005     | Antineoplastic                                                       |
| 0,872              | 0,015     | CDP-glycerol glycerophosphotransferase inhibitor                     |
| 0,857              | 0,004     | UDP-glucuronosyltransferase substrate                                |
| 0,835              | 0,004     | Oxidoreductase inhibitor                                             |
| 0,825              | 0,004     | Anticarcinogenic                                                     |
| 0,818              | 0,004     | Immunosuppressant                                                    |
| 0,801              | 0,005     | Antiprotozoal (Leishmania)                                           |
| 0,783              | 0,007     | CYP3A5 substrate                                                     |
| 0,780              | 0,006     | Glyceryl-ether monooxygenase inhibitor                               |
| 0,785              | 0,020     | CYP2H substrate                                                      |
| 0,757              | 0,004     | Alkenylglycerophosphoethanolamine hydrolase inhibitor                |
| 0,757              | 0,007     | Analeptic                                                            |
| 0,753              | 0,011     | Immunostimulant                                                      |
| 0,747              | 0,008     | Glucan endo-1,3-beta-D-glucosidase inhibitor                         |
| 0,727              | 0,004     | Dolichyl-diphosphooligosaccharide-protein glycotransferase inhibitor |
| 0,722              | 0,009     | Antifungal                                                           |
| 0,736              | 0,025     | Benzoate-CoA ligase inhibitor                                        |
| 0,712              | 0,003     | DELTA14-sterol reductase inhibitor                                   |
| 0,705              | 0,013     | Hypolipemic                                                          |
| <b>Compound #3</b> |           |                                                                      |
| 0,949              | 0,001     | Cholesterol antagonist                                               |
| 0,938              | 0,003     | Alkenylglycerophosphocholine hydrolase inhibitor                     |
| 0,914              | 0,003     | Caspase 3 stimulant                                                  |
| 0,893              | 0,005     | Antineoplastic                                                       |
| 0,873              | 0,004     | Membrane integrity antagonist                                        |
| 0,871              | 0,003     | Hepatoprotectant                                                     |
| 0,878              | 0,014     | CDP-glycerol glycerophosphotransferase inhibitor                     |

| Pa                 | Pi    |                                                                      |
|--------------------|-------|----------------------------------------------------------------------|
| 0,851              | 0,005 | Respiratory analeptic                                                |
| 0,848              | 0,005 | CYP3A4 inducer                                                       |
| 0,834              | 0,006 | Membrane permeability inhibitor                                      |
| 0,823              | 0,003 | Proliferative diseases treatment                                     |
| 0,820              | 0,002 | Dolichyl-diphosphooligosaccharide-protein glycotransferase inhibitor |
| 0,820              | 0,004 | Immunosuppressant                                                    |
| 0,821              | 0,005 | CYP3A inducer                                                        |
| 0,819              | 0,005 | UDP-glucuronosyltransferase substrate                                |
| 0,818              | 0,004 | Glucan endo-1,3-beta-D-glucosidase inhibitor                         |
| 0,808              | 0,005 | Glyceryl-ether monooxygenase inhibitor                               |
| 0,794              | 0,004 | Chemopreventive                                                      |
| 0,787              | 0,004 | Alkenylglycerophosphoethanolamine hydrolase inhibitor                |
| 0,796              | 0,018 | CYP2H substrate                                                      |
| 0,778              | 0,005 | Antihypercholesterolemic                                             |
| 0,739              | 0,007 | Antiprotozoal (Leishmania)                                           |
| 0,736              | 0,008 | Analeptic                                                            |
| 0,742              | 0,025 | Benzoate-CoA ligase inhibitor                                        |
| 0,716              | 0,002 | Dementia treatment                                                   |
| 0,713              | 0,009 | Antifungal                                                           |
| 0,705              | 0,004 | CYP2C9 inducer                                                       |
| <b>Compound #4</b> |       |                                                                      |
| 0,984              | 0,001 | Proliferative diseases treatment                                     |
| 0,977              | 0,000 | Cholesterol antagonist                                               |
| 0,963              | 0,001 | Chemopreventive                                                      |
| 0,952              | 0,002 | Anticarcinogenic                                                     |
| 0,952              | 0,002 | UDP-glucuronosyltransferase substrate                                |
| 0,942              | 0,000 | Dolichyl-diphosphooligosaccharide-protein glycotransferase inhibitor |
| 0,943              | 0,002 | Glyceryl-ether monooxygenase inhibitor                               |
| 0,942              | 0,004 | Antineoplastic                                                       |
| 0,938              | 0,003 | G-protein-coupled receptor kinase inhibitor                          |
| 0,938              | 0,003 | Beta-adrenergic receptor kinase inhibitor                            |
| 0,930              | 0,002 | Antiprotozoal (Leishmania)                                           |
| 0,881              | 0,005 | Apoptosis agonist                                                    |
| 0,855              | 0,004 | CYP3A inducer                                                        |
| 0,864              | 0,016 | CDP-glycerol glycerophosphotransferase inhibitor                     |
| 0,851              | 0,004 | UGT1A substrate                                                      |
| 0,849              | 0,002 | Bilirubin oxidase inhibitor                                          |
| 0,841              | 0,005 | CYP3A4 inducer                                                       |
| 0,838              | 0,005 | Hypolipemic                                                          |

| <b>Pa</b>          | <b>Pi</b> |                                                                      |
|--------------------|-----------|----------------------------------------------------------------------|
| 0,832              | 0,011     | CYP3A substrate                                                      |
| 0,808              | 0,008     | Respiratory analeptic                                                |
| 0,799              | 0,005     | Antifungal                                                           |
| 0,797              | 0,005     | Immunosuppressant                                                    |
| 0,795              | 0,015     | CYP3A4 substrate                                                     |
| 0,791              | 0,019     | CYP2H substrate                                                      |
| 0,764              | 0,001     | Dementia treatment                                                   |
| 0,749              | 0,004     | Galactolipase inhibitor                                              |
| 0,747              | 0,010     | CYP3A5 substrate                                                     |
| 0,730              | 0,001     | Vascular dementia treatment                                          |
| 0,715              | 0,002     | Beta-glucosidase inhibitor                                           |
| 0,723              | 0,028     | Alkenylglycerophosphocholine hydrolase inhibitor                     |
| 0,707              | 0,012     | Phosphatase inhibitor                                                |
| <b>Compound #5</b> |           |                                                                      |
| 0,995              | 0,001     | UDP-glucuronosyltransferase substrate                                |
| 0,991              | 0,000     | Cholesterol antagonist                                               |
| 0,991              | 0,001     | Chemopreventive                                                      |
| 0,977              | 0,000     | Dolichyl-diphosphooligosaccharide-protein glycotransferase inhibitor |
| 0,976              | 0,002     | UGT1A substrate                                                      |
| 0,975              | 0,001     | Beta-adrenergic receptor kinase inhibitor                            |
| 0,975              | 0,001     | G-protein-coupled receptor kinase inhibitor                          |
| 0,968              | 0,001     | Glyceryl-ether monooxygenase inhibitor                               |
| 0,967              | 0,002     | Hypolipemic                                                          |
| 0,962              | 0,001     | Beta-glucosidase inhibitor                                           |
| 0,957              | 0,002     | Antiprotozoal (Leishmania)                                           |
| 0,936              | 0,002     | Proliferative diseases treatment                                     |
| 0,922              | 0,001     | Bilirubin oxidase inhibitor                                          |
| 0,908              | 0,001     | Galactolipase inhibitor                                              |
| 0,905              | 0,001     | Neurotrophic factor enhancer                                         |
| 0,892              | 0,005     | Antineoplastic                                                       |
| 0,883              | 0,003     | Anticarcinogenic                                                     |
| 0,857              | 0,002     | Apoptosis antagonist                                                 |
| 0,857              | 0,005     | Respiratory analeptic                                                |
| 0,853              | 0,003     | Antifungal                                                           |
| 0,866              | 0,016     | CDP-glycerol glycerophosphotransferase inhibitor                     |
| 0,844              | 0,004     | CYP3A inducer                                                        |
| 0,845              | 0,012     | Alkenylglycerophosphocholine hydrolase inhibitor                     |
| 0,835              | 0,006     | Apoptosis agonist                                                    |

| <b>Pa</b>          | <b>Pi</b> |                                                                      |
|--------------------|-----------|----------------------------------------------------------------------|
| 0,831              | 0,005     | CYP3A4 inducer                                                       |
| 0,821              | 0,001     | Dementia treatment                                                   |
| 0,809              | 0,001     | Vascular dementia treatment                                          |
| 0,801              | 0,005     | Immunosuppressant                                                    |
| 0,786              | 0,003     | UGT1A4 substrate                                                     |
| 0,793              | 0,018     | CYP2H substrate                                                      |
| 0,773              | 0,009     | Antiinflammatory                                                     |
| 0,772              | 0,007     | Caspase 3 stimulant                                                  |
| 0,771              | 0,017     | CYP3A substrate                                                      |
| 0,751              | 0,003     | 4-Nitrophenylphosphatase inhibitor                                   |
| 0,753              | 0,005     | Phosphatase inhibitor                                                |
| 0,751              | 0,005     | Hepatoprotectant                                                     |
| 0,741              | 0,011     | Membrane integrity antagonist                                        |
| 0,730              | 0,003     | Caspase 8 stimulant                                                  |
| 0,729              | 0,012     | CYP3A5 substrate                                                     |
| 0,717              | 0,004     | Transcription factor NF kappa B stimulant                            |
| 0,717              | 0,004     | Transcription factor stimulant                                       |
| 0,725              | 0,013     | Oxidoreductase inhibitor                                             |
| 0,714              | 0,024     | CYP3A4 substrate                                                     |
| 0,706              | 0,030     | Benzoate-CoA ligase inhibitor                                        |
| <b>Compound #6</b> |           |                                                                      |
| 0,995              | 0,001     | UDP-glucuronosyltransferase substrate                                |
| 0,991              | 0,000     | Cholesterol antagonist                                               |
| 0,991              | 0,001     | Chemopreventive                                                      |
| 0,977              | 0,000     | Dolichyl-diphosphooligosaccharide-protein glycotransferase inhibitor |
| 0,976              | 0,002     | UGT1A substrate                                                      |
| 0,975              | 0,001     | Beta-adrenergic receptor kinase inhibitor                            |
| 0,975              | 0,001     | G-protein-coupled receptor kinase inhibitor                          |
| 0,968              | 0,001     | Glycerol-ether monooxygenase inhibitor                               |
| 0,967              | 0,002     | Hypolipemic                                                          |
| 0,962              | 0,001     | Beta-glucosidase inhibitor                                           |
| 0,957              | 0,002     | Antiprotozoal (Leishmania)                                           |
| 0,936              | 0,002     | Proliferative diseases treatment                                     |
| 0,922              | 0,001     | Bilirubin oxidase inhibitor                                          |
| 0,908              | 0,001     | Galactolipase inhibitor                                              |
| 0,905              | 0,001     | Neurotrophic factor enhancer                                         |
| 0,892              | 0,005     | Antineoplastic                                                       |
| 0,883              | 0,003     | Anticarcinogenic                                                     |

| <b>Pa</b>          | <b>Pi</b> |                                                                      |
|--------------------|-----------|----------------------------------------------------------------------|
| 0,857              | 0,002     | Apoptosis antagonist                                                 |
| 0,857              | 0,005     | Respiratory analeptic                                                |
| 0,853              | 0,003     | Antifungal                                                           |
| 0,866              | 0,016     | CDP-glycerol glycerophosphotransferase inhibitor                     |
| 0,844              | 0,004     | CYP3A inducer                                                        |
| 0,845              | 0,012     | Alkenylglycerophosphocholine hydrolase inhibitor                     |
| 0,835              | 0,006     | Apoptosis agonist                                                    |
| 0,831              | 0,005     | CYP3A4 inducer                                                       |
| 0,821              | 0,001     | Dementia treatment                                                   |
| 0,809              | 0,001     | Vascular dementia treatment                                          |
| 0,801              | 0,005     | Immunosuppressant                                                    |
| 0,786              | 0,003     | UGT1A4 substrate                                                     |
| 0,793              | 0,018     | CYP2H substrate                                                      |
| 0,773              | 0,009     | Antiinflammatory                                                     |
| 0,772              | 0,007     | Caspase 3 stimulant                                                  |
| 0,771              | 0,017     | CYP3A substrate                                                      |
| 0,751              | 0,003     | 4-Nitrophenylphosphatase inhibitor                                   |
| 0,753              | 0,005     | Phosphatase inhibitor                                                |
| 0,751              | 0,005     | Hepatoprotectant                                                     |
| 0,741              | 0,011     | Membrane integrity antagonist                                        |
| 0,730              | 0,003     | Caspase 8 stimulant                                                  |
| 0,729              | 0,012     | CYP3A5 substrate                                                     |
| 0,717              | 0,004     | Transcription factor NF kappa B stimulant                            |
| 0,717              | 0,004     | Transcription factor stimulant                                       |
| 0,725              | 0,013     | Oxidoreductase inhibitor                                             |
| 0,714              | 0,024     | CYP3A4 substrate                                                     |
| 0,706              | 0,030     | Benzoate-CoA ligase inhibitor                                        |
| <b>Compound #7</b> |           |                                                                      |
| 0,984              | 0,001     | Proliferative diseases treatment                                     |
| 0,977              | 0,000     | Cholesterol antagonist                                               |
| 0,963              | 0,001     | Chemopreventive                                                      |
| 0,952              | 0,002     | Anticarcinogenic                                                     |
| 0,952              | 0,002     | UDP-glucuronosyltransferase substrate                                |
| 0,942              | 0,000     | Dolichyl-diphosphooligosaccharide-protein glycotransferase inhibitor |
| 0,943              | 0,002     | Glyceryl-ether monooxygenase inhibitor                               |
| 0,942              | 0,004     | Antineoplastic                                                       |
| 0,938              | 0,003     | G-protein-coupled receptor kinase inhibitor                          |
| 0,938              | 0,003     | Beta-adrenergic receptor kinase inhibitor                            |

| <b>Pa</b> | <b>Pi</b> |                                                  |
|-----------|-----------|--------------------------------------------------|
| 0,930     | 0,002     | Antiprotozoal (Leishmania)                       |
| 0,881     | 0,005     | Apoptosis agonist                                |
| 0,855     | 0,004     | CYP3A inducer                                    |
| 0,864     | 0,016     | CDP-glycerol glycerophosphotransferase inhibitor |
| 0,851     | 0,004     | UGT1A substrate                                  |
| 0,849     | 0,002     | Bilirubin oxidase inhibitor                      |
| 0,841     | 0,005     | CYP3A4 inducer                                   |
| 0,838     | 0,005     | Hypolipemic                                      |
| 0,832     | 0,011     | CYP3A substrate                                  |
| 0,808     | 0,008     | Respiratory analeptic                            |
| 0,799     | 0,005     | Antifungal                                       |
| 0,797     | 0,005     | Immunosuppressant                                |
| 0,795     | 0,015     | CYP3A4 substrate                                 |
| 0,791     | 0,019     | CYP2H substrate                                  |
| 0,764     | 0,001     | Dementia treatment                               |
| 0,749     | 0,004     | Galactolipase inhibitor                          |
| 0,747     | 0,010     | CYP3A5 substrate                                 |
| 0,730     | 0,001     | Vascular dementia treatment                      |
| 0,715     | 0,002     | Beta-glucosidase inhibitor                       |
| 0,723     | 0,028     | Alkenylglycerophosphocholine hydrolase inhibitor |
| 0,707     | 0,012     | Phosphatase inhibitor                            |
